# Supplementary material
Source: PubMed Central journal article supplement (PMC4607632)
Supplement: NIHMS709560-supplement-3.pdf [file NIHMS709560-supplement-3.pdf]

## Cheminformatic comparison of approved drugs from natural product versus synthetic origins

Christopher F. Stratton,<sup>1</sup> David J. Newman,<sup>2</sup> and Derek S. Tan<sup>1,3</sup>

<sup>1</sup>*Tri-Institutional PhD Program in Chemical Biology,*  
<sup>3</sup>*Chemical Biology Program and Tri-Institutional Research Program*  
*Memorial Sloan Kettering Cancer Center,*  
*1275 York Ave, Box 422, New York, NY 10065, USA*

<sup>2</sup>*Natural Products Branch, Developmental Therapeutics Program,*  
*Division of Cancer Treatment and Diagnosis, National Cancer Institute*  
*Frederick, P.O. Box B, Frederick, Maryland 21702 USA*

### Supplementary Information

|                                                                                                                              |            |
|------------------------------------------------------------------------------------------------------------------------------|------------|
| <b>I. Supplementary Tables and Figures</b>                                                                                   | <b>S2</b>  |
| Table S1. Median values for analysis of approved drugs.                                                                      | S2         |
| Table S2. Molecular weight normalization for size-dependent parameters.                                                      | S2         |
| Table S3. Standard deviation and percent contribution for each principal component in the PCA of approved drugs (R Summary). | S3         |
| Table S4. Mean values of physicochemical parameters for NCEs 1981–2010 parsed in five-year intervals.                        | S4         |
| Table S5. Median values of physicochemical parameters for NCEs 1981–2010 parsed in five-year intervals.                      | S5         |
| Figure S1. Time-resolved PCA plots for NCEs 1981–2010.                                                                       | S6         |
| <b>II. List of Compounds Used in the Analysis</b>                                                                            | <b>S7</b>  |
| <b>III. Calculation of Structural and Physicochemical Parameters</b>                                                         | <b>S30</b> |
| A. Calculation of Parameters using InstantJChem                                                                              | S30        |
| B. Batch Calculation of ALOGPs and ALOGpS                                                                                    | S31        |
| <b>IV. Principal Component Analysis</b>                                                                                      | <b>S32</b> |
| <b>V. Supplementary References</b>                                                                                           | <b>S33</b> |

## I. SUPPLEMENTARY TABLES AND FIGURES

|                        | <i>Natural product drugs (NP)</i> | <i>NP-derived drugs (ND)</i> | <i>NP-inspired synthetic drugs (S*, S*/NM)</i> | <i>Completely synthetic drugs (S, S/NM)</i> |
|------------------------|-----------------------------------|------------------------------|------------------------------------------------|---------------------------------------------|
| <b>MW</b>              | 414                               | 467                          | 345                                            | 337                                         |
| <b>N</b>               | 1                                 | 2                            | 2                                              | 2                                           |
| <b>O</b>               | 6                                 | 5                            | 4                                              | 3                                           |
| <b>HBD</b>             | 4                                 | 2                            | 2                                              | 1                                           |
| <b>HBA</b>             | 7                                 | 6                            | 5                                              | 4                                           |
| <b>RotB</b>            | 7                                 | 7                            | 6                                              | 5                                           |
| <b>nStereo</b>         | 7                                 | 5                            | 1                                              | 1                                           |
| <b>nStMW</b>           | 0.013                             | 0.010                        | 0.004                                          | 0.002                                       |
| <b>Fsp<sup>3</sup></b> | 0.67                              | 0.59                         | 0.48                                           | 0.33                                        |
| <b>tPSA</b>            | 140                               | 113                          | 91                                             | 67                                          |
| <b>VWSA</b>            | 646                               | 657                          | 517                                            | 478                                         |
| <b>relPSA</b>          | 0.19                              | 0.18                         | 0.15                                           | 0.14                                        |
| <b>Rings</b>           | 3                                 | 4                            | 3                                              | 3                                           |
| <b>RngAr</b>           | 0                                 | 1                            | 2                                              | 2                                           |
| <b>RngSys</b>          | 2                                 | 2                            | 2                                              | 2                                           |
| <b>RngLg</b>           | 6                                 | 6                            | 6                                              | 6                                           |
| <b>RRSys</b>           | 1.0                               | 1.5                          | 1.3                                            | 1.0                                         |
| <b>ALOGPs</b>          | 2.0                               | 2.4                          | 1.9                                            | 2.9                                         |
| <b>ALOGpS</b>          | -3.6                              | -4.3                         | -3.4                                           | -3.8                                        |
| <b>LogD</b>            | -0.4                              | 0.5                          | 0.2                                            | 1.6                                         |

**Table S1. Median values for analysis of approved drugs.** ALOGPs = logP; ALOGpS = logS; Fsp<sup>3</sup> = fraction sp<sup>3</sup> carbons; HBA = hydrogen-bond acceptors; HBD = hydrogen-bond donors; MW = molecular weight; N = nitrogens; nStereo = stereocenters; nStMW = stereochemical density (nStereo ÷ MW); O = oxygens; relPSA = relative polar surface area; RngAr = aromatic rings; RngLg = largest ring size; RngSys = ring systems; RRSys = rings per ring system (Rings ÷ RngSys), VWSA = van der Waals surface area; tPSA = topological polar surface area.

|                     | <i>Natural product drugs (NP)</i> | <i>NP-derived drugs (ND)</i> | <i>NP-inspired synthetic drugs (S*, S*/NM)</i> | <i>Completely synthetic drugs (S, S/NM)</i> |
|---------------------|-----------------------------------|------------------------------|------------------------------------------------|---------------------------------------------|
| <b>N ÷ MW</b>       | 0.007 (0.002)                     | 0.007 (0.004)                | 0.008 (0.006)                                  | 0.007 (0.006)                               |
| <b>O ÷ MW</b>       | 0.015 (0.015)                     | 0.013 (0.011)                | 0.011 (0.012)                                  | 0.008 (0.009)                               |
| <b>HBD ÷ MW</b>     | 0.010 (0.010)                     | 0.008 (0.004)                | 0.006 (0.006)                                  | 0.004 (0.003)                               |
| <b>HBA ÷ MW</b>     | 0.016 (0.017)                     | 0.015 (0.013)                | 0.014 (0.015)                                  | 0.012 (0.012)                               |
| <b>RotB ÷ MW</b>    | 0.018 (0.017)                     | 0.020 (0.015)                | 0.020 (0.017)                                  | 0.015 (0.015)                               |
| <b>nStereo ÷ MW</b> | <b>0.013 (0.017)</b>              | <b>0.011 (0.011)</b>         | <b>0.005 (0.003)</b>                           | <b>0.002 (0.003)</b>                        |

**Table S2. Molecular weight normalization for size-dependent parameters.** Mean and (median) values for molecular weight-normalized parameters are shown. For each compound class, nitrogen atom count (N), oxygen atom count (O), hydrogen bond donor count (HBD), hydrogen bond acceptor count (HBA), rotatable bond count (RotB), and stereocenter count (nStereo) were normalized by dividing average parameter values (mean or median) by the average molecular weight (mean or median).

|                               | PC1   | PC2   | PC3   | PC4   | PC5   | PC6   | PC7   | PC8   | PC9   | PC10  |
|-------------------------------|-------|-------|-------|-------|-------|-------|-------|-------|-------|-------|
| <b>Standard deviation</b>     | 3.062 | 1.868 | 1.609 | 1.158 | 0.941 | 0.820 | 0.696 | 0.502 | 0.487 | 0.466 |
| <b>Proportion of Variance</b> | 0.469 | 0.175 | 0.129 | 0.067 | 0.044 | 0.034 | 0.024 | 0.013 | 0.012 | 0.011 |
| <b>Cumulative Proportion</b>  | 0.469 | 0.643 | 0.773 | 0.840 | 0.884 | 0.917 | 0.942 | 0.954 | 0.966 | 0.977 |

**Table S3. Standard deviation and percent contribution for each principal component in the PCA of approved drugs (R Summary).** The first three principal components (PC1–PC3) retain 77% of the information in the full 20-dimensional dataset, while >90% of the information in the full dataset is represented in the first six principal components (PC1–PC6).

|                                   | MW        |      | N    | O    | HBD  | HBA  | RotB | tPSA | WASA | relPSA | nStereo | NSMMW |         |        | Fsp* | Rings | RngAr | RngSyS | RngLg | RRSyS | ALOGPs | ALOGPs Logd |
|-----------------------------------|-----------|------|------|------|------|------|------|------|------|--------|---------|-------|---------|--------|------|-------|-------|--------|-------|-------|--------|-------------|
|                                   | N         | W    |      |      |      |      |      |      |      |        |         | NSMMW | nStereo | relPSA |      |       |       |        |       |       |        |             |
| <b>Natural product</b>            | 1981-1985 | 613  | 3.7  | 9.4  | 5.3  | 10.4 | 11.1 | 196  | 930  | 0.23   | 9.2     | 0.014 | 0.71    | 3.2    | 0.8  | 2.5   | 8.5   | 1.3    | 1.4   | -3.2  | -2.2   |             |
|                                   | 1986-1990 | 456  | 1.4  | 7.2  | 3.9  | 7.5  | 8.7  | 134  | 708  | 0.20   | 7.8     | 0.013 | 0.73    | 2.7    | 0.3  | 1.7   | 5.4   | 1.4    | 2.1   | -3.2  | -0.03  |             |
|                                   | 1991-1995 | 864  | 8.3  | 11.9 | 11.4 | 14.5 | 16.6 | 325  | 1247 | 0.24   | 9.0     | 0.012 | 0.60    | 3.6    | 1.6  | 2.6   | 14.3  | 1.6    | 0.6   | -3.5  | -4.1   |             |
|                                   | 1996-2000 | 352  | 0.8  | 5.3  | 1.3  | 5.0  | 3.0  | 89   | 557  | 0.21   | 5.0     | 0.009 | 0.70    | 2.0    | 0.0  | 0.8   | 9.0   | 1.5    | 0.5   | -2.6  | 0.6    |             |
|                                   | 2001-2005 | 1526 | 17.7 | 21.3 | 21.7 | 25.0 | 26.3 | 644  | 2145 | 0.27   | 11.7    | 0.005 | 0.54    | 3.3    | 1.7  | 2.0   | 27.7  | 1.8    | 0.02  | -3.9  | -18.1  |             |
|                                   | 2006-2010 | 651  | 3.5  | 8.5  | 4.0  | 8.5  | 3.0  | 156  | 891  | 0.18   | 5.5     | 0.008 | 0.56    | 5.5    | 1.5  | 1.0   | 13.0  | 5.5    | 2.0   | -3.9  | 2.4    |             |
| <b>NP-derived</b>                 | 1981-1985 | 482  | 3.6  | 5.7  | 2.8  | 7.0  | 9.0  | 137  | 681  | 0.20   | 4.1     | 0.009 | 0.53    | 3.5    | 1.4  | 2.1   | 6.1   | 1.9    | 1.7   | -4.1  | -1.0   |             |
|                                   | 1986-1990 | 539  | 3.3  | 7.1  | 3.7  | 7.8  | 9.1  | 155  | 771  | 0.20   | 6.0     | 0.011 | 0.58    | 3.8    | 1.4  | 2.1   | 6.9   | 2.1    | 2.1   | -3.8  | -0.3   |             |
|                                   | 1991-1995 | 494  | 3.2  | 5.6  | 3.1  | 6.7  | 8.9  | 130  | 727  | 0.20   | 4.8     | 0.010 | 0.61    | 3.6    | 1.1  | 2.0   | 6.4   | 2.0    | 2.2   | -4.0  | 0.5    |             |
|                                   | 1996-2000 | 691  | 4.7  | 9.5  | 5.7  | 10.1 | 14.3 | 218  | 1007 | 0.20   | 7.5     | 0.012 | 0.64    | 3.6    | 1.1  | 2.3   | 7.4   | 2.0    | 1.9   | -3.9  | -1.5   |             |
|                                   | 2001-2005 | 954  | 8.4  | 12.9 | 10.2 | 14.3 | 22.1 | 344  | 1389 | 0.22   | 10.3    | 0.012 | 0.66    | 4.0    | 1.5  | 2.3   | 9.3   | 2.0    | 1.7   | -3.5  | -4.9   |             |
|                                   | 2006-2010 | 821  | 4.5  | 11.8 | 6.6  | 12.3 | 16.9 | 250  | 1194 | 0.19   | 10.0    | 0.012 | 0.64    | 4.7    | 1.3  | 2.3   | 10.7  | 2.5    | 2.6   | -4.4  | -1.8   |             |
| <b>NP-inspired</b>                | 1981-1985 | 321  | 2.2  | 3.6  | 2.7  | 4.5  | 7.4  | 84   | 498  | 0.18   | 1.3     | 0.004 | 0.49    | 2.0    | 1.5  | 1.5   | 6.0   | 1.4    | 1.9   | -3.2  | 0.02   |             |
|                                   | 1986-1990 | 340  | 2.1  | 3.9  | 2.5  | 4.8  | 7.8  | 87   | 520  | 0.18   | 1.9     | 0.005 | 0.52    | 2.0    | 1.3  | 1.6   | 5.7   | 1.2    | 1.4   | -3.3  | -0.3   |             |
|                                   | 1991-1995 | 415  | 2.7  | 4.9  | 1.8  | 5.7  | 8.2  | 97   | 611  | 0.19   | 2.3     | 0.006 | 0.48    | 3.1    | 2.0  | 2.2   | 6.0   | 1.5    | 1.6   | -3.6  | 0.2    |             |
|                                   | 1996-2000 | 378  | 3.3  | 3.1  | 2.2  | 4.5  | 6.1  | 89   | 552  | 0.17   | 1.4     | 0.003 | 0.41    | 3.1    | 2.2  | 2.2   | 6.4   | 1.5    | 2.4   | -3.7  | 1.0    |             |
|                                   | 2001-2005 | 435  | 4.0  | 4.5  | 2.7  | 6.0  | 8.2  | 119  | 631  | 0.20   | 2.2     | 0.005 | 0.46    | 3.3    | 2.2  | 2.3   | 6.0   | 1.6    | 1.6   | -3.5  | 0.2    |             |
|                                   | 2006-2010 | 456  | 4.3  | 4.9  | 3.9  | 6.4  | 9.4  | 136  | 658  | 0.23   | 2.6     | 0.006 | 0.45    | 2.9    | 2.1  | 2.5   | 6.0   | 1.1    | 1.6   | -3.4  | 0.7    |             |
| <b>Completely synthetic drugs</b> | 1981-1985 | 319  | 2.3  | 2.6  | 1.1  | 3.7  | 4.8  | 62   | 453  | 0.15   | 0.6     | 0.002 | 0.35    | 2.6    | 1.8  | 2.1   | 5.9   | 1.3    | 2.7   | -3.6  | 1.7    |             |
|                                   | 1986-1990 | 335  | 2.3  | 3.1  | 1.4  | 4.3  | 5.3  | 73   | 473  | 0.17   | 0.9     | 0.002 | 0.37    | 2.6    | 1.8  | 2.0   | 5.9   | 1.3    | 2.6   | -3.7  | 1.5    |             |
|                                   | 1991-1995 | 334  | 2.3  | 2.9  | 1.1  | 4.1  | 5.0  | 68   | 469  | 0.16   | 0.8     | 0.002 | 0.39    | 2.6    | 1.7  | 2.0   | 5.8   | 1.3    | 2.6   | -3.5  | 1.3    |             |
|                                   | 1996-2000 | 345  | 2.5  | 2.9  | 1.4  | 4.4  | 5.5  | 73   | 497  | 0.16   | 0.8     | 0.003 | 0.39    | 2.8    | 1.9  | 2.2   | 5.8   | 1.3    | 2.7   | -3.7  | 1.3    |             |
|                                   | 2001-2005 | 380  | 2.9  | 3.1  | 1.4  | 4.8  | 5.4  | 80   | 524  | 0.17   | 0.8     | 0.002 | 0.30    | 3.4    | 2.5  | 2.9   | 6.0   | 1.2    | 2.8   | -4.0  | 1.7    |             |
|                                   | 2006-2010 | 387  | 2.8  | 2.7  | 1.5  | 4.4  | 5.9  | 73   | 558  | 0.14   | 1.1     | 0.003 | 0.38    | 3.3    | 2.3  | 2.5   | 6.2   | 1.4    | 3.1   | -3.9  | 1.8    |             |

**Table S4. Mean values of physicochemical parameters for NCEs 1981-2010 parsed in five-year intervals.** Mean values of each chemical descriptor are shown for natural product drugs (NP), natural product-derived drugs (ND), natural product-inspired synthetic drugs (S\*, S\*/NM) and completely synthetic drugs (S, S/NM) in five-year time blocks from 1981-2010.

| Natural product<br>drugs (NP) | Natural product |      |      |      |      |      |       |      |       |         | NP-derived<br>drugs (ND) |      |       |       |        |       |       |        |       |      | NP-inspired<br>drugs (S*, S*/NM) |      |     |     |      |      |       |       |         |      | Completely<br>synthetic drugs<br>(S, S*/NM) |       |       |        |       |       |        |      |      |      |     |      |     |      |      |     |       |         |      |      |       |       |        |       |       |        |      |     |      |      |     |      |      |      |     |       |         |      |      |       |       |        |       |       |        |      |     |     |      |     |
|-------------------------------|-----------------|------|------|------|------|------|-------|------|-------|---------|--------------------------|------|-------|-------|--------|-------|-------|--------|-------|------|----------------------------------|------|-----|-----|------|------|-------|-------|---------|------|---------------------------------------------|-------|-------|--------|-------|-------|--------|------|------|------|-----|------|-----|------|------|-----|-------|---------|------|------|-------|-------|--------|-------|-------|--------|------|-----|------|------|-----|------|------|------|-----|-------|---------|------|------|-------|-------|--------|-------|-------|--------|------|-----|-----|------|-----|
|                               | MW              | N    | O    | HBD  | HBA  | RotB | tpSA  | WSA  | rapSA | nStereo | nSMW                     | FSP3 | Rings | RngAr | RngSyS | RngLg | FRSyS | ALOGPs | Logd  | MW   | N                                | O    | HBD | HBA | RotB | tpSA | WSA   | rapSA | nStereo | nSMW | FSP3                                        | Rings | RngAr | RngSyS | RngLg | FRSyS | ALOGPs | Logd | MW   | N    | O   | HBD  | HBA | RotB | tpSA | WSA | rapSA | nStereo | nSMW | FSP3 | Rings | RngAr | RngSyS | RngLg | FRSyS | ALOGPs | Logd | MW  | N    | O    | HBD | HBA  | RotB | tpSA | WSA | rapSA | nStereo | nSMW | FSP3 | Rings | RngAr | RngSyS | RngLg | FRSyS | ALOGPs | Logd |     |     |      |     |
| 1981-1985                     | 470             | 1.0  | 7.5  | 4.0  | 10.0 | 7.5  | 177.4 | 720  | 0.18  | 10.5    | 0.016                    | 0.72 | 3.0   | 0.0   | 2.5    | 6.0   | 1.0   | 2.3    | -3.9  | 0.5  | 445                              | 2.00 | 6.0 | 2.0 | 6.0  | 8.0  | 107.0 | 620   | 0.18    | 4.0  | 0.007                                       | 0.51  | 4.0   | 1.0    | 2.0   | 6.0   | 1.3    | 1.4  | -4.0 | -0.5 | 292 | 2.00 | 3.0 | 2.0  | 4.0  | 6.0 | 73.7  | 488     | 0.14 | 1.0  | 0.003 | 0.54  | 2.0    | 1.0   | 1.0   | 6.0    | 1.0  | 2.1 | -3.2 | -0.2 | 321 | 2.00 | 2.0  | 1.0  | 3.0 | 4.0   | 59.2    | 440  | 0.14 | 0.0   | 0.000 | 0.33   | 3.0   | 2.0   | 2.0    | 6.0  | 1.0 | 2.9 | -3.8 | 1.6 |
| 1986-1990                     | 313             | 0.5  | 4.5  | 3.0  | 4.0  | 7.5  | 81.5  | 533  | 0.17  | 4.5     | 0.015                    | 0.74 | 3.0   | 0.0   | 1.5    | 6.0   | 1.0   | 2.2    | -3.5  | -0.7 | 475                              | 1.00 | 7.0 | 2.0 | 6.0  | 7.0  | 111.6 | 646   | 0.18    | 5.0  | 0.010                                       | 0.57  | 4.0   | 1.0    | 2.0   | 6.0   | 1.5    | 2.5  | -4.2 | 1.2  | 342 | 2.00 | 4.0 | 2.0  | 5.0  | 8.0 | 95.8  | 524     | 0.15 | 1.5  | 0.004 | 0.55  | 2.0    | 1.0   | 2.0   | 6.0    | 1.0  | 1.6 | -3.5 | -0.1 | 321 | 2.00 | 3.0  | 1.0  | 4.0 | 5.0   | 66.4    | 449  | 0.15 | 0.0   | 0.000 | 0.33   | 3.0   | 2.0   | 2.0    | 6.0  | 1.0 | 2.6 | -3.7 | 1.5 |
| 1991-1995                     | 553             | 1.0  | 9.5  | 4.0  | 9.0  | 6.0  | 166.0 | 826  | 0.23  | 7.0     | 0.012                    | 0.55 | 4.0   | 1.5   | 2.0    | 7.0   | 1.2   | 0.3    | -4.4  | -1.6 | 413                              | 3.00 | 5.0 | 2.0 | 6.0  | 6.0  | 112.7 | 645   | 0.18    | 3.0  | 0.009                                       | 0.60  | 3.0   | 1.0    | 2.0   | 6.0   | 1.5    | 2.6  | -4.4 | 0.7  | 358 | 2.00 | 4.0 | 2.0  | 5.0  | 7.0 | 95.9  | 485     | 0.15 | 2.0  | 0.006 | 0.50  | 3.0    | 2.0   | 2.0   | 6.0    | 1.5  | 1.8 | -3.3 | 0.0  | 320 | 2.00 | 3.0  | 1.0  | 4.0 | 4.0   | 64.3    | 473  | 0.14 | 1.0   | 0.002 | 0.36   | 3.0   | 2.0   | 2.0    | 6.0  | 1.0 | 2.8 | -3.7 | 1.3 |
| 1996-2000                     | 189             | 1.0  | 3.0  | 1.0  | 3.0  | 3.0  | 60.3  | 288  | 0.16  | 2.5     | 0.008                    | 0.71 | 2.0   | 0.0   | 0.5    | 3.5   | 1.0   | 0.0    | -2.4  | -0.6 | 450                              | 1.00 | 5.0 | 3.0 | 6.0  | 7.0  | 113.5 | 710   | 0.18    | 6.5  | 0.011                                       | 0.63  | 3.0   | 0.5    | 2.0   | 6.0   | 1.3    | 2.4  | -4.3 | 1.2  | 335 | 3.00 | 3.0 | 2.0  | 4.0  | 5.0 | 75.1  | 517     | 0.14 | 1.0  | 0.003 | 0.43  | 3.0    | 2.0   | 2.0   | 6.0    | 1.5  | 2.2 | -3.6 | 1.0  | 351 | 2.00 | 3.0  | 1.0  | 4.0 | 5.0   | 70.9    | 495  | 0.15 | 1.0   | 0.002 | 0.35   | 3.0   | 2.0   | 2.0    | 6.0  | 1.0 | 2.7 | -3.8 | 1.5 |
| 2001-2005                     | 1621            | 17.0 | 26.0 | 22.0 | 27.0 | 35.0 | 702.0 | 2289 | 0.31  | 13.0    | 0.008                    | 0.53 | 4.0   | 1.0   | 2.0    | 31.0  | 2.0   | -0.5   | -18.9 | -2.4 | 492                              | 1.50 | 6.0 | 3.0 | 5.0  | 7.0  | 116.0 | 686   | 0.22    | 6.0  | 0.012                                       | 0.69  | 4.0   | 1.0    | 2.0   | 6.0   | 1.5    | 1.9  | -4.3 | -1.2 | 391 | 3.50 | 4.0 | 2.0  | 6.0  | 7.0 | 113.5 | 553     | 0.17 | 2.0  | 0.005 | 0.47  | 3.0    | 2.0   | 2.0   | 6.0    | 1.5  | 1.7 | -3.2 | 0.3  | 373 | 2.00 | 3.0  | 1.0  | 5.0 | 5.0   | 76.7    | 507  | 0.13 | 1.0   | 0.002 | 0.31   | 3.0   | 2.0   | 3.0    | 6.0  | 1.0 | 3.2 | -4.2 | 1.9 |
| 2006-2010                     | 651             | 3.5  | 8.5  | 4.0  | 8.5  | 3.0  | 155.7 | 891  | 0.18  | 5.5     | 0.008                    | 0.56 | 5.5   | 1.5   | 1.0    | 13.0  | 5.5   | 2.0    | -3.9  | 2.4  | 518                              | 1.00 | 7.0 | 3.0 | 8.0  | 10.0 | 133.9 | 786   | 0.14    | 8.0  | 0.013                                       | 0.61  | 4.0   | 1.0    | 2.0   | 6.0   | 1.7    | 3.3  | -4.6 | 2.1  | 368 | 2.50 | 4.5 | 3.0  | 5.0  | 6.0 | 99.1  | 514     | 0.18 | 2.5  | 0.006 | 0.42  | 2.5    | 2.0   | 2.0   | 6.0    | 1.0  | 1.9 | -4.2 | 0.4  | 403 | 3.00 | 3.0  | 1.0  | 4.0 | 5.0   | 73.8    | 551  | 0.14 | 1.0   | 0.002 | 0.36   | 3.0   | 2.0   | 3.0    | 6.0  | 1.3 | 3.0 | -4.1 | 2.2 |

**Table S5. Median values of physicochemical parameters for NCEs 1981-2010 parsed in five-year intervals.** Median values of each chemical descriptor are shown for natural product drugs (NP), natural product-derived drugs (ND), natural product-inspired synthetic drugs (S\*, S\*/NM) and synthetic drugs (S, S/NM) in five-year time blocks from 1981-2010.

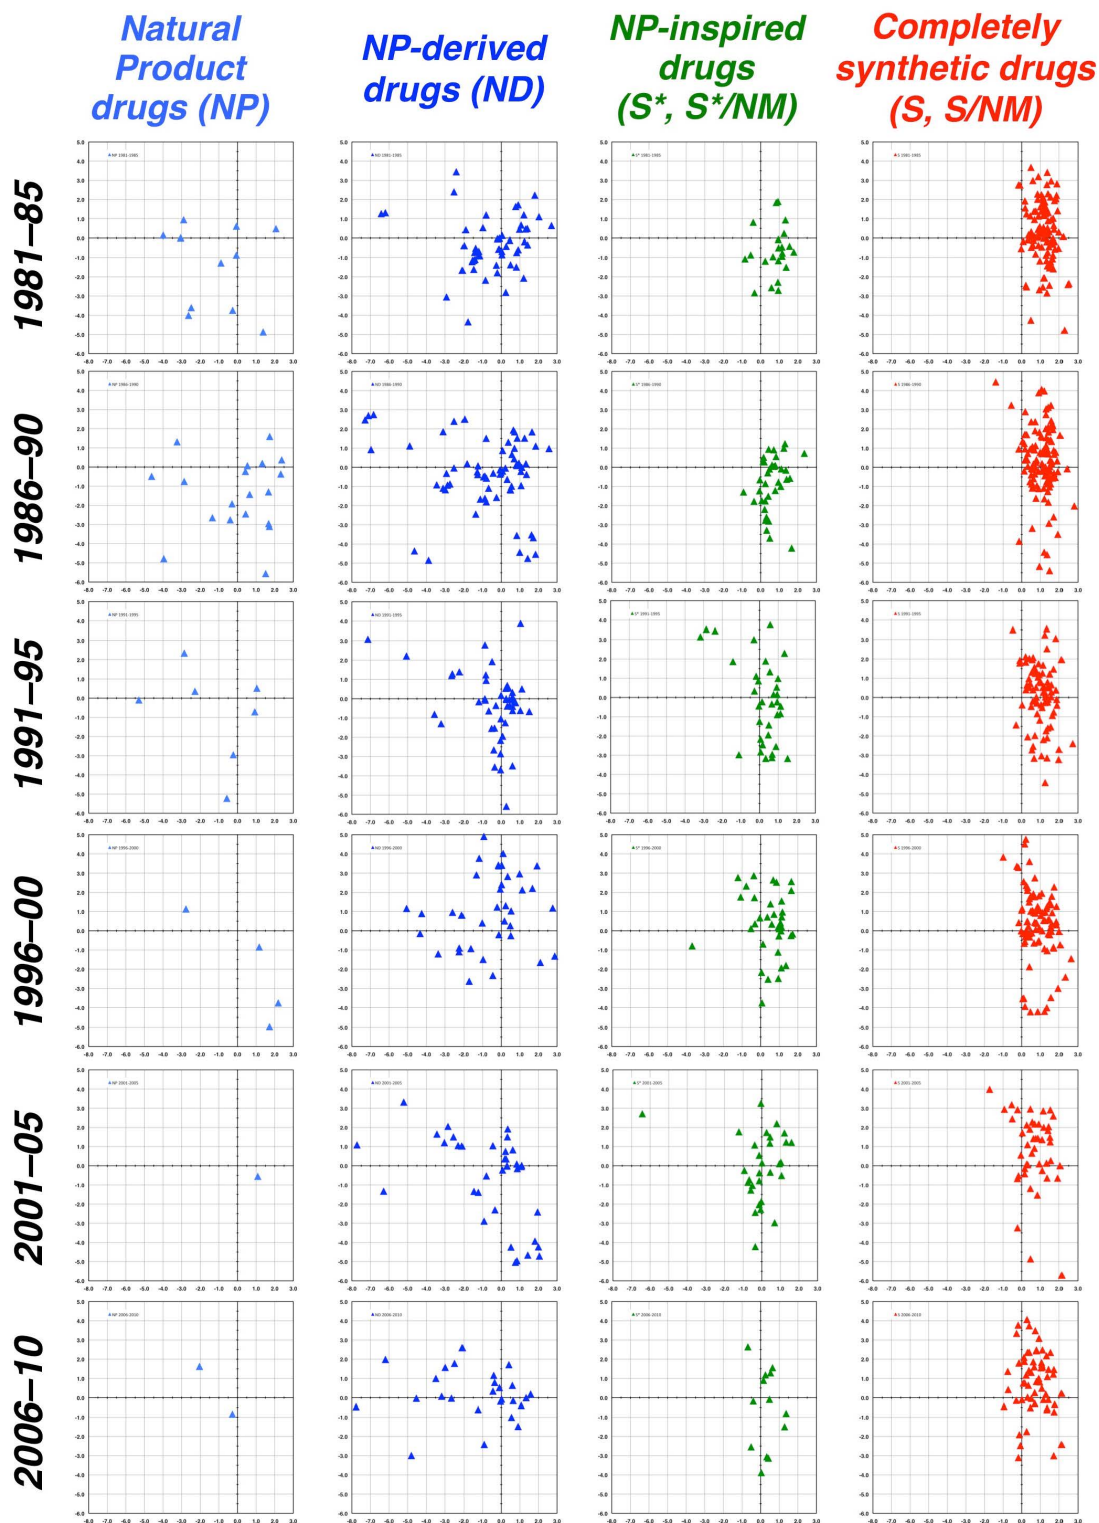

**Figure S1. Time-resolved PCA plots for NCEs 1981–2010.** Data from a single analysis are presented in five year blocks for natural product drugs (NP), natural product derived drugs (ND), natural product-inspired drugs (S\*, S\*/NM), and completely synthetic drugs (S, S/NM).

## II. LIST OF COMPOUNDS USED IN THE ANALYSIS

Small-molecule drugs included in the analysis are listed below. The drugs are organized by year of approval, generic and trade names, and compound source (N = natural product, ND = natural product-derived, S\* = natural product inspired synthetic, S = completely synthetics, NM = natural product mimic, NB = natural product botanical).

| Year | Generic Name          | Trade Name   | Source |
|------|-----------------------|--------------|--------|
| 1981 | aclarubicin           | Aclacin      | N      |
| 1981 | netilimicin sulfate   | Netromicine  | N      |
| 1981 | peplomycin            | Pepleo       | N      |
| 1982 | isotretinoin          | Accutane     | N      |
| 1982 | micronomicin sulfate  | Sagamicin    | N      |
| 1983 | chenodiol             | Chenix       | N      |
| 1983 | cyclosporine          | Sandimmun    | N      |
| 1983 | meglutol              | Lipoglutaren | N      |
| 1984 | mizoribine            | Bredinin     | N      |
| 1985 | miokamycin            | Miocamycin   | N      |
| 1985 | mupirocin             | Bactroban    | N      |
| 1985 | podophyllotoxin       | Condylina    | N      |
| 1986 | dronabinol            | Marinol      | N      |
| 1987 | anabasine_HCl         | Gamibasin    | N      |
| 1987 | artemisinin           | Artemisin    | N      |
| 1987 | bucillamine           | Rimatil      | N      |
| 1987 | ganglioside_GM1       | Sygen        | N      |
| 1987 | ivermectin            | Mectizan     | N      |
| 1987 | lovastatin            | Mevacor      | N      |
| 1987 | plaunotol             | Kelnac       | N      |
| 1987 | ubenimex              | Bestatin     | N      |
| 1988 | carumonam             | Amasulin     | N      |
| 1988 | fosfomicin trometamol | Monuril      | N      |
| 1988 | gamolenic acid        | Epogam       | N      |
| 1988 | isepamicin            | Isepacin     | N      |
| 1988 | simvastatin           | Zocor        | N      |
| 1989 | adenosine             | Adenocard    | N      |
| 1989 | azelaic acid          | Skinoren     | N      |
| 1989 | pravastatin           | Mevalotin    | N      |
| 1989 | RV-11                 | Zalig        | N      |
| 1992 | masoprocol            | Actinex      | N      |
| 1992 | pentostatin           | Nipent       | N      |
| 1993 | paclitaxel            | Taxol        | N      |
| 1993 | tacrolimus            | Prograf      | N      |
| 1994 | angiotensin II        | Delivert     | N      |

|      |                              |                   |    |
|------|------------------------------|-------------------|----|
| 1994 | voglibose                    | Basen             | N  |
| 1995 | carperitide                  | Hanp              | N  |
| 1995 | galanthamine HBr             | Nivalin           | N  |
| 1996 | betain anhydrous             | Cystadane         | N  |
| 1999 | arglabin                     | arglabin          | N  |
| 1999 | sirolimus                    | Rapamune          | N  |
| 2000 | aminolevulinic acid HCl      | Levulan           | N  |
| 2003 | daptomycin                   | Cubicin           | N  |
| 2003 | mycophenolate sodium         | Myfortic          | N  |
| 2005 | ziconotide                   | Prialt            | N  |
| 2007 | trabectedin                  | Yondelis          | N  |
| 2010 | romidepsin                   | Istodax           | N  |
| 1987 | guglipid                     | Guglip            | NB |
| 1989 | solamargines                 | Curaderm          | NB |
| 1981 | budesonide                   | Pulmicort         | ND |
| 1981 | cefoperazone sodium          | Cefobis           | ND |
| 1981 | cefotiam HCl                 | Pansporin         | ND |
| 1981 | cefsoludin sodium            | Takesulin         | ND |
| 1981 | desogestrel/ethinylestradiol | Marvelon          | ND |
| 1981 | sulprostone                  | Nalador           | ND |
| 1981 | testosterone undecanoate     | Restandol         | ND |
| 1982 | apalcillin sodium            | Lumota            | ND |
| 1982 | atracurium besilate          | Nimbex            | ND |
| 1982 | ceftizoxime sodium           | Epocelin          | ND |
| 1982 | ceftriaxone sodium           | Rocephin          | ND |
| 1982 | lisuride maleate             | Dopergin          | ND |
| 1982 | moxalactam disodium          | Shiomarin         | ND |
| 1982 | vecuronium bromide           | Norcuron          | ND |
| 1983 | cefmenoxime HCl              | Tacef             | ND |
| 1983 | ceftazidime                  | Fortam            | ND |
| 1983 | elliptinium acetate          | Celiptium         | ND |
| 1983 | epoprostenol sodium          | Flolan            | ND |
| 1983 | gemeprost                    | Cervagem          | ND |
| 1983 | halometasone                 | Sicorten          | ND |
| 1983 | hydrocortisone butyrate      | Pandel            | ND |
| 1983 | oxitropium bromide           | Oxivent           | ND |
| 1983 | promegestone                 | Surgestone        | ND |
| 1984 | aztreonam                    | Azactam           | ND |
| 1984 | buserelin acetate            | Suprefact         | ND |
| 1984 | cefonicid sodium             | Monocid           | ND |
| 1984 | ceforanide                   | Precef            | ND |
| 1984 | cefotetan disodium           | Yamatetan         | ND |
| 1984 | epirubicin HCl               | Farmorubicin      | ND |
| 1984 | ibopamine HCl                | Inopamil/Scandine | ND |
| 1984 | leuprolide acetate           | Enantone          | ND |



|      |                              |               |    |
|------|------------------------------|---------------|----|
| 1984 | melinamide                   | Artes_Oil     | ND |
| 1984 | naltrexone HCl               | ReVia         | ND |
| 1984 | nicorandil                   | Sigmat        | ND |
| 1984 | sofalcone                    | Solon         | ND |
| 1984 | temocillin disodium          | Temopen       | ND |
| 1984 | teprenone                    | Selbex        | ND |
| 1985 | alclometasone dipropionate   | Vaderm        | ND |
| 1985 | astromycin sulfate           | Fortimicin    | ND |
| 1985 | cefbuperazone sodium         | Tomiporan     | ND |
| 1985 | cefpiramide sodium           | Sepatren      | ND |
| 1985 | cimetropium bromide          | Alginor       | ND |
| 1985 | doxofylline                  | Ansimar       | ND |
| 1985 | enprostil                    | Gardrin       | ND |
| 1985 | imipenem/cilastatin          | Zienam        | ND |
| 1985 | mefloquine HCl               | Fansimef      | ND |
| 1985 | misoprostol                  | Cytotec       | ND |
| 1985 | nabumetone                   | Relifex       | ND |
| 1985 | rifaximin                    | Rifacol       | ND |
| 1985 | rosaprostol                  | Rosal         | ND |
| 1985 | thymopentin                  | Sintomodulina | ND |
| 1986 | brovincamine fumarate        | Sabromin      | ND |
| 1986 | deflazacort                  | Deflan        | ND |
| 1986 | gestrinone                   | Dimetrose     | ND |
| 1986 | gonadoreline-6-D-trp acetate | Decapeptyl    | ND |
| 1986 | idebenone                    | Avan          | ND |
| 1986 | levacecarnine HCl            | Nicetile      | ND |
| 1986 | nedocromil sodium            | Tilade        | ND |
| 1986 | nomegestrol acetate          | Lutenyl       | ND |
| 1986 | norgestimate                 | Cilest        | ND |
| 1986 | prednicarbate                | Dermatop      | ND |
| 1986 | rokitamycin                  | Ricamycin     | ND |
| 1986 | sulbactam sodium             | Sulperazone   | ND |
| 1986 | triptorelin                  | Decapeptyl    | ND |
| 1987 | amlexanox                    | Solfa         | ND |
| 1987 | artemether                   | Artemetheri   | ND |
| 1987 | artenusate                   | Arinate       | ND |
| 1987 | aspoxicillin                 | Doyle         | ND |
| 1987 | cefixime                     | Cefspan       | ND |
| 1987 | cefminox sodium              | Meicelin      | ND |
| 1987 | cefpimizole                  | Ajicef        | ND |
| 1987 | cefteram pivoxil             | Tomiron       | ND |
| 1987 | cefuroxime axetil            | Zinnat        | ND |
| 1987 | cefuzonam sodium             | Cosmosin      | ND |
| 1987 | gestodene/ethinylestradiol   | Femodene      | ND |
| 1987 | goserelin                    | Zoladex       | ND |

|      |                            |             |    |
|------|----------------------------|-------------|----|
| 1987 | hidrosmin                  | Venosmil    | ND |
| 1987 | lenampicillin HCl          | Veracillin  | ND |
| 1987 | metergolin                 | Liserdol    | ND |
| 1987 | micinicate                 | Micivas     | ND |
| 1987 | midoriamin                 | Midoriamine | ND |
| 1987 | mometasone furoate         | Elocon      | ND |
| 1987 | ornoprostil                | Alloca      | ND |
| 1987 | rifamixin                  | Normix      | ND |
| 1987 | roxithromycin              | Rulid       | ND |
| 1987 | sultamycillin tosylate     | Unasyn      | ND |
| 1988 | azithromycin               | Sumamed     | ND |
| 1988 | choline alfoscerate        | Delecit     | ND |
| 1988 | erythromycin acistrate     | Erasis      | ND |
| 1988 | flomoxef sodium            | Flumarin    | ND |
| 1988 | flutropium bromide         | Flubron     | ND |
| 1988 | halopredone acetate        | Haloart     | ND |
| 1988 | hydrocortisone aceponate   | Retef       | ND |
| 1988 | limaprost                  | Opalmon     | ND |
| 1988 | mifepristone               | Mifegyne    | ND |
| 1988 | octreotide                 | Sandostatin | ND |
| 1988 | pergolide mesylate         | Permax      | ND |
| 1988 | pirarubicin                | Pinorubicin | ND |
| 1988 | propentofylline propionate | Hextol      | ND |
| 1988 | rifapentine                | Rifampin    | ND |
| 1988 | secalciferol               | Osteo_D     | ND |
| 1988 | tibolone                   | Livial      | ND |
| 1989 | acitretin                  | Neotigason  | ND |
| 1989 | cefpodoxime proxetil       | Banan       | ND |
| 1989 | deslorelin                 | Somagard    | ND |
| 1989 | ipriflavone                | Osten       | ND |
| 1989 | tiopronin                  | Thiola      | ND |
| 1989 | vigabatrin                 | Sabril      | ND |
| 1989 | vinorelbine                | Navelbine   | ND |
| 1990 | acarbose                   | Glucobay    | ND |
| 1990 | arbakacin                  | Habekacin   | ND |
| 1990 | cefodizime sodium          | Neucef      | ND |
| 1990 | clarithromycin             | Klaricid    | ND |
| 1990 | eflornithine HCl           | Ornidyl     | ND |
| 1990 | ethyl icosapentate         | Epadel      | ND |
| 1990 | fluticasone propionate     | Flixonase   | ND |
| 1990 | idarubicin hydrochloride   | Zavedos     | ND |
| 1990 | nafarelin acetate          | Synarel     | ND |
| 1990 | rebamipide                 | Mucosta     | ND |
| 1991 | calcipotriol               | Daivonex    | ND |
| 1991 | cefdinir                   | Cefzon      | ND |

|      |                                |            |    |
|------|--------------------------------|------------|----|
| 1991 | cloricromene                   | Proendotel | ND |
| 1991 | halobetasol propionate         | Ultravate  | ND |
| 1991 | romurtide                      | Nopia      | ND |
| 1992 | beraprost sodium               | Dorner     | ND |
| 1992 | cefetamet pivoxil HCl          | Globocef   | ND |
| 1992 | cefprome sulfate               | Cefrom     | ND |
| 1992 | cefprozil                      | Cefzil     | ND |
| 1992 | ceftibuten                     | Seftem     | ND |
| 1992 | deprodone propionate           | Eclar      | ND |
| 1992 | finasteride                    | Proscar    | ND |
| 1992 | iloprost                       | Ilomedin   | ND |
| 1992 | loracarbef                     | Lorabid    | ND |
| 1992 | rifabutin                      | Mycobutin  | ND |
| 1992 | sapropterin hydrochloride      | Biopten    | ND |
| 1992 | tazobactam sodium              | Tazobac    | ND |
| 1993 | alendronate sodium             | Alendros   | ND |
| 1993 | cabergoline                    | Dostinex   | ND |
| 1993 | cefepime                       | Maxipime   | ND |
| 1993 | cladribine                     | Leustatin  | ND |
| 1993 | cytarabine ocfosfate           | Starasid   | ND |
| 1993 | dirithromycin                  | Nortron    | ND |
| 1993 | ecabet sodium                  | Gastrom    | ND |
| 1993 | formestane                     | Lentaron   | ND |
| 1993 | histrelin                      | Supprelin  | ND |
| 1993 | miltefosine                    | Miltex     | ND |
| 1993 | tacalcitol                     | Bonalfa    | ND |
| 1993 | tretinoin tocoferil            | Olcenon    | ND |
| 1994 | betamethasone butyrate propion | Antebate   | ND |
| 1994 | cefditoren pivoxil             | Meiact     | ND |
| 1994 | docarpamine                    | Tanadopa   | ND |
| 1994 | gusperimus trihydrochloride    | Spanidin   | ND |
| 1994 | irinotecan hydrochloride       | Campto     | ND |
| 1994 | meropenem                      | Merrem     | ND |
| 1994 | panipenem/betamipron           | Carbenin   | ND |
| 1994 | polaprezinc                    | Promac     | ND |
| 1994 | quinagolide hydrochloride      | Norprolac  | ND |
| 1994 | rocuronium bromide             | Zemuron    | ND |
| 1994 | trimetrexate glucuronate       | Neutrexin  | ND |
| 1994 | unoprostone isopropyl ester    | Rescula    | ND |
| 1994 | zinostatin stimalamer          | Smancs     | ND |
| 1995 | cefozopran HCl                 | Firstcin   | ND |
| 1995 | docetaxel                      | Taxotere   | ND |
| 1995 | lanreotide acetate             | Somatuline | ND |
| 1995 | mycophenolate mofetil          | CellCept   | ND |
| 1995 | nalmefene HCl                  | Revex      | ND |

|      |                               |                 |    |
|------|-------------------------------|-----------------|----|
| 1995 | rimexolone                    | Vexol           | ND |
| 1995 | tirilazad mesylate            | Freedox         | ND |
| 1996 | etoposide phosphate           | Etopophos       | ND |
| 1996 | glycopin                      | Licopid         | ND |
| 1996 | latanoprost                   | Xalatan         | ND |
| 1996 | prezatide copper acetate      | Lamin_gel       | ND |
| 1996 | topotecan HCl                 | Hycamtin        | ND |
| 1997 | cefcapene pivoxil             | Flomox          | ND |
| 1997 | flurithromycin ethylsuccinate | Ritro           | ND |
| 1997 | fropenam                      | Farom           | ND |
| 1998 | cefoselis                     | Wincef          | ND |
| 1998 | loteprednol etabonate         | Lotemax         | ND |
| 1998 | miglitol                      | Diastabol       | ND |
| 1998 | orlistat                      | Xenical         | ND |
| 1998 | paricalcitol                  | Zemplar         | ND |
| 1998 | sermorelin acetate            | Geref           | ND |
| 1999 | alitretinoin                  | Panretin        | ND |
| 1999 | cetorelix                     | Cetrotide       | ND |
| 1999 | colforsin dapropate HCl       | Adehl           | ND |
| 1999 | dalfopristin                  | Synercid        | ND |
| 1999 | doxercalciferol               | Hectorol        | ND |
| 1999 | exemestane                    | Aromasin        | ND |
| 1999 | melevodopa (CHF-1301)         | Levomet         | ND |
| 1999 | oseltamivir                   | Tamiflu         | ND |
| 1999 | quinupristin                  | Synercid        | ND |
| 1999 | rapacuronium bromide          | Raplon          | ND |
| 1999 | valrubicin                    | Valstar         | ND |
| 1999 | zanamivir                     | Relenza         | ND |
| 2000 | arteether                     | Artemotil       | ND |
| 2000 | atosiban                      | Tractocile      | ND |
| 2000 | bivalrudin                    | Angiomax        | ND |
| 2000 | dosmalfate                    | Diotul          | ND |
| 2000 | drospirenone                  | Yasmin          | ND |
| 2000 | egualen sodium                | Azuloxa         | ND |
| 2000 | ganirelix acetate             | Orgalutran      | ND |
| 2000 | gemtuzumab ozogamicin         | Mylotarg        | ND |
| 2000 | maxacalcitol                  | Prezios         | ND |
| 2000 | medroxyprogesterone/estradiol | Lunelle         | ND |
| 2000 | taltirelin                    | Ceredist        | ND |
| 2000 | trimegesrone/estradiol        | Totelle Sekvens | ND |
| 2001 | aminolevulinic acid me ester  | Metvix          | ND |
| 2001 | bimatoprost                   | Lumigan         | ND |
| 2001 | caspofungin acetate           | Cancidas        | ND |
| 2001 | dutaseride                    | Duagen          | ND |
| 2001 | falecalcitriol                | Horner/Fulstan  | ND |

|      |                                |                 |    |
|------|--------------------------------|-----------------|----|
| 2001 | fudosteine                     | Cleanal/Spelear | ND |
| 2001 | nesiritide                     | Natrecor        | ND |
| 2001 | norelgestromin/ethinylestradio | Ortho_Evra      | ND |
| 2001 | telithromycin                  | Ketek           | ND |
| 2001 | travoprost                     | Travatan        | ND |
| 2002 | amrubicin HCl                  | Calsed          | ND |
| 2002 | biapenem                       | Omegacin        | ND |
| 2002 | eplerenone                     | Inspira         | ND |
| 2002 | ertapenem sodium               | Invanz          | ND |
| 2002 | etonogestrel/ethinylestradiol  | NuvaRing        | ND |
| 2002 | fondaparinux sodium            | Arixtra         | ND |
| 2002 | fulvestrant                    | Faslodex        | ND |
| 2002 | miconazole sodium              | Funguard        | ND |
| 2002 | pimecrolimus (SDZ-ASM-981)     | Elidel          | ND |
| 2002 | sodium oxybate                 | Xyrem           | ND |
| 2002 | teriparatide                   | Forteo          | ND |
| 2002 | treprostinil sodium            | Remodulin       | ND |
| 2003 | carglumic acid                 | Carbaglu        | ND |
| 2003 | drospirenone/estradiol         | Angeliq         | ND |
| 2003 | enfuvirtide                    | Fuzeon          | ND |
| 2003 | estradiol/nomegestrol acetate  | Naemis          | ND |
| 2003 | miglustat                      | Zavesca         | ND |
| 2004 | belotecan hydrochloride        | Camtobell       | ND |
| 2004 | estradiol/levonorgestrel       | Climara Pro     | ND |
| 2004 | everolimus                     | Certican        | ND |
| 2004 | hexyl aminolevulinate          | Hexvix          | ND |
| 2004 | pregabalin                     | Lyrica          | ND |
| 2004 | talaporfin sodium              | Laserphyrin     | ND |
| 2004 | vapreotide acetate             | Docrised        | ND |
| 2005 | ciclesonide                    | Alvesco         | ND |
| 2005 | doripenem                      | Finibax         | ND |
| 2005 | extenatide                     | Byetta          | ND |
| 2005 | L-alanyl-L-glutamine           | Dipeptiven      | ND |
| 2005 | pralmorelin                    | GHRP_Kaken_100  | ND |
| 2005 | tigecycline                    | Tygacil         | ND |
| 2005 | triproamylin acetate           | Normylin        | ND |
| 2005 | zotarolimus                    | Endeavor        | ND |
| 2006 | anecortave acetate             | Retaane         | ND |
| 2006 | anidulafungin                  | Eraxis          | ND |
| 2006 | lubiprostone                   | Amitiza         | ND |
| 2007 | fluticasone furoate            | Allermist       | ND |
| 2007 | ixabepilone                    | Ixempra         | ND |
| 2007 | lisdexamfetamine mesilate      | Vyvanse         | ND |
| 2007 | retapamulin                    | Altabax         | ND |
| 2007 | temsirolimus                   | Torisel         | ND |

|      |                          |            |    |
|------|--------------------------|------------|----|
| 2008 | biolimus a9              | BioMatrix  | ND |
| 2008 | ceftobiprole medocaril   | Zeftera    | ND |
| 2008 | dienogest                | Dinigest   | ND |
| 2008 | difluprednate            | Durezol    | ND |
| 2008 | icatibant acetate        | Firazyr    | ND |
| 2008 | methylnaltrexone bromide | Relistor   | ND |
| 2008 | sugammadex sodium        | Bridion    | ND |
| 2008 | tafluprost               | Taflotan   | ND |
| 2009 | liraglutide              | Victoza    | ND |
| 2009 | nalfurafine HCl          | Remitch    | ND |
| 2009 | pralatrexate             | Folotylin  | ND |
| 2009 | telavancin HCl           | Vibativ    | ND |
| 2009 | uliprisnil acetate       | ellaOne    | ND |
| 2010 | cabazitaxel              | Jevtana    | ND |
| 2010 | diquafosol tetrasodium   | Diquas     | ND |
| 2010 | eribulin                 | Halaven    | ND |
| 2010 | fingolimod HCl           | Gilenya    | ND |
| 2010 | laninamivir octanoate    | Inavir     | ND |
| 2010 | mifamurtide              | Junovan    | ND |
| 2010 | vinflunine               | Javlor     | ND |
| 2010 | zucapsacin               | Civanex    | ND |
| 1981 | acyclovir                | Zovirax    | S* |
| 1981 | carmofur                 | Mifurof    | S* |
| 1981 | indoramin HCl            | Wydora     | S* |
| 1981 | inosine pranobex         | Imunovir   | S* |
| 1983 | befunolol HCl            | Bentox     | S* |
| 1983 | celiprolol HCl           | Selectol   | S* |
| 1983 | enocitabine              | Sunrabin   | S* |
| 1984 | fosfosol                 | Disdolen   | S* |
| 1984 | mitoxantrone HCl         | Novantrone | S* |
| 1985 | progabide                | Gabrene    | S* |
| 1987 | doxifluridine            | Furtulon   | S* |
| 1987 | eptazocine HBr           | Sedapain   | S* |
| 1987 | zidovudine               | Retrovir   | S* |
| 1988 | epervudine               | Hevizos    | S* |
| 1988 | ganciclovir              | Cymeveve   | S* |
| 1989 | acamprosate              | Aotal      | S* |
| 1989 | ethanolamine oleate      | Ethamolin  | S* |
| 1991 | didanosine               | Videx      | S* |
| 1991 | doxacurium chloride      | Nuromax    | S* |
| 1991 | fludarabine phosphate    | Fludara    | S* |
| 1992 | atovaquone               | Mepron     | S* |
| 1992 | mivacurium chloride      | Mivacron   | S* |
| 1992 | zalcitabine              | Hivid      | S* |
| 1993 | gabapentin               | Neurontin  | S* |

|      |                               |                     |       |
|------|-------------------------------|---------------------|-------|
| 1993 | sorivudine                    | Usevir              | S*    |
| 1994 | famciclovir                   | Famvir              | S*    |
| 1994 | stavudine                     | Zerit               | S*    |
| 1995 | cisatracurium besilate        | Nimbex              | S*    |
| 1995 | gemcitabine HCl               | Gemzar              | S*    |
| 1995 | lamivudine                    | Epivir              | S*    |
| 1995 | topiramate                    | Topamax             | S*    |
| 1995 | valaciclovir HCl              | Valtrex             | S*    |
| 1996 | cidofovir                     | Vistide             | S*    |
| 1996 | penciclovir                   | Vectavir            | S*    |
| 1998 | capecitabine                  | Xeloda              | S*    |
| 1999 | abacavir sulfate              | Ziagen              | S*    |
| 1999 | kinetin                       | Kinerase            | S*    |
| 1999 | nateglinide                   | Starsis             | S*    |
| 2000 | bulaquine / chloroquine       | Aablaquin           | S*    |
| 2001 | tenofovir disoproxil fumarate | Viread              | S*    |
| 2001 | valganciclovir                | Valcyte             | S*    |
| 2002 | adefovir dipivoxil            | Hepsera             | S*    |
| 2002 | timodepressin                 | Thymodepressin      | S*    |
| 2003 | emtricitabine                 | Emtriva             | S*    |
| 2004 | azacytidine                   | Vidaza              | S*    |
| 2004 | ximelagatran                  | Exanta              | S*    |
| 2005 | clofarabine                   | Clolar              | S*    |
| 2005 | entecavir                     | Baraclude           | S*    |
| 2006 | decitabine                    | Dacogen             | S*    |
| 2006 | nelarabine                    | Arranon             | S*    |
| 2006 | telbivudine                   | Sebivo              | S*    |
| 2007 | clevudine                     | Levovir             | S*    |
| 2008 | etravirine                    | Intelence           | S*    |
| 1981 | cloranolol HCl                | Tobanum             | S*/NM |
| 1981 | mepindolol sulfate            | Corindolan          | S*/NM |
| 1981 | penbutanol sulfate            | Betapressin         | S*/NM |
| 1981 | tulobuterol HCl               | Berachin            | S*/NM |
| 1982 | carteolol HCl                 | Teoptic             | S*/NM |
| 1982 | methypranolol                 | Minims_metipranolol | S*/NM |
| 1983 | betaxolol HCl                 | Kerlone             | S*/NM |
| 1983 | pirbuterol HCL                | Exirel              | S*/NM |
| 1984 | bucladesine sodium            | Actosin             | S*/NM |
| 1984 | enalapril maleate             | Renitec             | S*/NM |
| 1985 | bopindolol                    | Sandonorm           | S*/NM |
| 1985 | levobunolol HCl               | Betagan             | S*/NM |
| 1986 | arotinolol HCl                | Almarl              | S*/NM |
| 1986 | bisoprolol fumarate           | Concor              | S*/NM |
| 1986 | formoterol fumarate           | Atock               | S*/NM |
| 1986 | mabuterol HCl                 | Broncholin          | S*/NM |

|      |                           |           |       |
|------|---------------------------|-----------|-------|
| 1987 | bevantolol HCl            | Ranestol  | S*/NM |
| 1987 | enalaprilat               | Renitec   | S*/NM |
| 1987 | esmolol HCl               | Brevibloc | S*/NM |
| 1987 | lisinopril                | Prinivil  | S*/NM |
| 1987 | tertatolol HCl            | Artex     | S*/NM |
| 1988 | alacepril                 | Cetapril  | S*/NM |
| 1988 | amosulalol                | Lowgan    | S*/NM |
| 1988 | denopamine                | Kalgut    | S*/NM |
| 1988 | nipradilol                | Hypadil   | S*/NM |
| 1988 | perindopril               | Coversyl  | S*/NM |
| 1988 | xamoterol fumarate        | Corwin    | S*/NM |
| 1989 | citalopram                | Cipramil  | S*/NM |
| 1989 | delapril                  | Adecut    | S*/NM |
| 1989 | dilevalol                 | Levadil   | S*/NM |
| 1989 | dopexamine                | Dopacard  | S*/NM |
| 1989 | droxidopa                 | DOPS      | S*/NM |
| 1989 | quinapril                 | Accupro   | S*/NM |
| 1989 | ramipril                  | Triatec   | S*/NM |
| 1990 | argatroban                | Slonnon   | S*/NM |
| 1990 | bambuterol                | Bambec    | S*/NM |
| 1990 | benazepril hydrochloride  | Cibacen   | S*/NM |
| 1990 | cilazapril                | Inhibace  | S*/NM |
| 1990 | ondansetron hydrochloride | Zophren   | S*/NM |
| 1990 | remoxipride hydrochloride | Roxiam    | S*/NM |
| 1990 | salmeterol xinafoate      | Serevent  | S*/NM |
| 1991 | carvedilol                | Dilatrend | S*/NM |
| 1991 | centchroman               | Choice_7  | S*/NM |
| 1991 | fosinopril sodium         | Staril    | S*/NM |
| 1991 | granisetron hydrochloride | Kytril    | S*/NM |
| 1991 | moxonidine                | Cynt      | S*/NM |
| 1991 | sumatriptan succinate     | Imigran   | S*/NM |
| 1992 | tilisolol hydrochloride   | Daim      | S*/NM |
| 1992 | tropisetron               | Novaban   | S*/NM |
| 1993 | acetorphan                | Tiorfan   | S*/NM |
| 1993 | brodimoprin               | Hyprim    | S*/NM |
| 1993 | imidapril HCl             | Tanatril  | S*/NM |
| 1993 | trandolapril              | Odrik     | S*/NM |
| 1994 | fluvastatin sodium        | Lescol    | S*/NM |
| 1994 | nazasetron hydrochloride  | Serotone  | S*/NM |
| 1994 | temocapril hydrochloride  | Acecol    | S*/NM |
| 1995 | itopride HCl              | Ganaton   | S*/NM |
| 1995 | moexipril HCl             | Univasc   | S*/NM |
| 1995 | pranlukast                | Onon      | S*/NM |
| 1995 | saquinavir mesylate       | Invirase  | S*/NM |
| 1995 | spirapril HCl             | Setrilan  | S*/NM |



|      |                          |            |       |
|------|--------------------------|------------|-------|
| 1996 | indinavir sulfate        | Crixivan   | S*/NM |
| 1996 | loprinone HCl            | Coretec    | S*/NM |
| 1996 | raltitrexed              | Tomudex    | S*/NM |
| 1996 | ramosetron               | Nasea      | S*/NM |
| 1996 | ritonavir                | Norvir     | S*/NM |
| 1996 | ropinirole HCl           | ReQuip     | S*/NM |
| 1996 | sertindole               | Serdolect  | S*/NM |
| 1996 | tiagabine                | Gabitril   | S*/NM |
| 1997 | anagrelide HCl           | Agrylin    | S*/NM |
| 1997 | atorvastin calcium       | Lipitor    | S*/NM |
| 1997 | cerivastatin             | Lipobay    | S*/NM |
| 1997 | naratriptan HCl          | Naramig    | S*/NM |
| 1997 | neflinavir mesylate      | Viracept   | S*/NM |
| 1997 | tazarotene               | Zorac      | S*/NM |
| 1997 | tolcapone                | Tasmar     | S*/NM |
| 1997 | zomitriptan              | Zomig      | S*/NM |
| 1998 | dolasetron mesylate      | Anzemet    | S*/NM |
| 1998 | entacapone               | Comtess    | S*/NM |
| 1998 | rizatriptan benzoate     | Maxalt     | S*/NM |
| 1998 | sildenafil citrate       | Viagra     | S*/NM |
| 1999 | amprenavir               | Agenerase  | S*/NM |
| 1999 | epitilibatide            | Integrilin | S*/NM |
| 1999 | levalbuterol HCl         | Xopenex    | S*/NM |
| 1999 | temozolomide             | Temodal    | S*/NM |
| 2000 | almotriptan              | Almogran   | S*/NM |
| 2000 | alosetron HCL            | Lotronex   | S*/NM |
| 2000 | bexarotene               | Targretin  | S*/NM |
| 2000 | cevimeline HCl           | Evoxac     | S*/NM |
| 2000 | lopinavir                | Aluviran   | S*/NM |
| 2000 | ziprasidone HCl          | Zeldox     | S*/NM |
| 2000 | zofenapril calcium       | Zantipres  | S*/NM |
| 2001 | eletriptan               | Relpax     | S*/NM |
| 2001 | perspirene hydrochloride | Lullan     | S*/NM |
| 2001 | tegaserod maleate        | Zelmac     | S*/NM |
| 2002 | escitalopram             | Ciprallex  | S*/NM |
| 2002 | frovatriptan             | Frova      | S*/NM |
| 2002 | landiolol                | Onoact     | S*/NM |
| 2002 | tiotropium bromide       | Spiriva    | S*/NM |
| 2003 | atazanavir               | Reyataz    | S*/NM |
| 2003 | atomoxetine              | Strattera  | S*/NM |
| 2003 | fosamprenavir            | Lexiva     | S*/NM |
| 2003 | palonosetron             | Aloxi      | S*/NM |
| 2003 | pitavastatin             | Livalo     | S*/NM |
| 2003 | rosuvastatin             | Crestor    | S*/NM |
| 2003 | tadalafil                | Cialis     | S*/NM |

|      |                          |            |       |
|------|--------------------------|------------|-------|
| 2003 | vardenafil               | Levitra    | S*/NM |
| 2004 | abarelix                 | Plenaxis   | S*/NM |
| 2004 | indiseton hydrochloride  | Sinseron   | S*/NM |
| 2004 | pemetrexed disodium      | Alimta     | S*/NM |
| 2005 | tamibarotene             | Amnoid     | S*/NM |
| 2005 | tipranavir               | Aptivus    | S*/NM |
| 2005 | udenafil                 | Zydena     | S*/NM |
| 2006 | vorinostat               | Zolinza    | S*/NM |
| 2007 | aliskiren fumarate       | Tekturna   | S*/NM |
| 2007 | arformoterol tartrate    | Brovana    | S*/NM |
| 2008 | alvimopan hydrate        | Entereg    | S*/NM |
| 2008 | dabigatran etexilate     | Pradaxa    | S*/NM |
| 2008 | lacosamide               | Vimpat     | S*/NM |
| 2008 | rivaroxaban              | Xarelto    | S*/NM |
| 2009 | degarelix                | Firmagon   | S*/NM |
| 2009 | indacaterol maleate      | Onbrez     | S*/NM |
| 1981 | alizapride               | Liticum    | S     |
| 1981 | amezinium methylsulfate  | Supratonin | S     |
| 1981 | aminoglutethimide        | Cytadren   | S     |
| 1981 | azurene                  | Impromen   | S     |
| 1981 | bepidil HCl              | Cordium    | S     |
| 1981 | carprofen                | Rimadyl    | S     |
| 1981 | cliofibrate              | Lipoclin   | S     |
| 1981 | isosorbide 5-mononitrate | Ismo       | S     |
| 1981 | ketoconazole             | Nizoral    | S     |
| 1981 | lonazolac calcium        | Lonax      | S     |
| 1981 | morniflumate             | Niflam     | S     |
| 1981 | nicardipine HCl          | Perpidine  | S     |
| 1981 | nifurzide                | Ricridene  | S     |
| 1981 | oxatomide                | Tinset     | S     |
| 1981 | piretanide               | Tauliz     | S     |
| 1981 | ranitidine HCl           | Zantac     | S     |
| 1981 | tocainide HCl            | Tonocard   | S     |
| 1981 | trifusal                 | Disgren    | S     |
| 1981 | urapidil                 | Ebrantil   | S     |
| 1981 | valproate sodium         | Depacon    | S     |
| 1982 | albendazole              | Eskazole   | S     |
| 1982 | ciclopirox olamine       | Loprox     | S     |
| 1982 | ethyl loflazepate        | Victan     | S     |
| 1982 | flecainide               | Tambocor   | S     |
| 1982 | flumecinol               | Zixoryn    | S     |
| 1982 | gemfibrozil              | Lopid      | S     |
| 1982 | halazepam                | Paxipam    | S     |
| 1982 | memantine HCl            | Akatinol   | S     |
| 1982 | midazolam maleate        | Versed     | S     |

|      |                      |              |   |
|------|----------------------|--------------|---|
| 1982 | pirprofen            | Rengasil     | S |
| 1982 | pranoprofen          | Niflan       | S |
| 1982 | talniflumate         | Lomucin      | S |
| 1982 | tranilast            | Rizaben      | S |
| 1982 | zotepine             | Zoleptil     | S |
| 1983 | acetohydroxamic acid | Lithostat    | S |
| 1983 | afloqualone          | Arofuto      | S |
| 1983 | alfentanil HCl       | Rapifen      | S |
| 1983 | alminoprofen         | Minalfene    | S |
| 1983 | amineptine           | Maneon       | S |
| 1983 | astemizole           | Hismanal     | S |
| 1983 | auranofin            | Ridaura      | S |
| 1983 | bifonazole           | Mycospor     | S |
| 1983 | brotizolam           | Lendormin    | S |
| 1983 | budralazine          | Buteraxine   | S |
| 1983 | butyl flufenamate    | Fenazole     | S |
| 1983 | divalproex sodium    | Depakote     | S |
| 1983 | eperisone HCl        | Myonal       | S |
| 1983 | fenbuprol            | Valbil       | S |
| 1983 | flutamide            | Drogenil     | S |
| 1983 | gallopamil HCl       | Procorum     | S |
| 1983 | guanadrel sulfate    | Hylorel      | S |
| 1983 | indalpine            | Upstene      | S |
| 1983 | isoxicam             | Pacyl        | S |
| 1983 | linsidomine          | Corvasal     | S |
| 1983 | loprazolam mesylate  | Dormonoct    | S |
| 1983 | meptazinol HCl       | Meptid       | S |
| 1983 | muzolimine           | Edrul        | S |
| 1983 | nefopam HCl          | Acupan       | S |
| 1983 | nitrefazole          | Altimol      | S |
| 1983 | norfloxacin          | Noroxin      | S |
| 1983 | oxaprozin            | Duraprox     | S |
| 1983 | oxiconazole nitrate  | Oceral       | S |
| 1983 | sufentanil           | Sufenta      | S |
| 1983 | suprofen             | Maldocil     | S |
| 1983 | terconazole          | Gyno-Terazol | S |
| 1983 | tianeptine sodium    | Stablon      | S |
| 1983 | tioconazole          | Trosyl       | S |
| 1983 | tiropramide          | Maiorad      | S |
| 1984 | butoctamide          | Listomin_S   | S |
| 1984 | detomidine HCl       | Domosedan    | S |
| 1984 | emorfazone           | Pentoil      | S |
| 1984 | etizolam             | Depas        | S |
| 1984 | flutazolam           | Coreminal    | S |
| 1984 | indobufen            | Ibustrin     | S |

|      |                       |                 |   |
|------|-----------------------|-----------------|---|
| 1984 | isofezolac            | Sofenac         | S |
| 1984 | lidamide HCl          | Lidaryl         | S |
| 1984 | mepixanox             | Pimexone        | S |
| 1984 | mesalamine            | Asacol          | S |
| 1984 | metapramine           | Timaxel         | S |
| 1984 | mexazolam             | Melex           | S |
| 1984 | naftifine HCl         | Exoderil        | S |
| 1984 | piketoprofen          | Calmatel        | S |
| 1984 | quinamide             | Amenox          | S |
| 1984 | terazocin HCl         | Hytrin          | S |
| 1984 | timiperone            | Tolopelon       | S |
| 1984 | tiquizium bromide     | Thiaton         | S |
| 1985 | acipimox              | Olbetam         | S |
| 1985 | bupirone HCl          | Bespar          | S |
| 1985 | cibenzoline succinate | Cipralan        | S |
| 1985 | ciprofibrate          | Lipanor         | S |
| 1985 | diacerein             | Artrodar        | S |
| 1985 | doxefaxepam           | Doxans          | S |
| 1985 | etodolac              | Lodine          | S |
| 1985 | famotidine            | Gaster/Pepticid | S |
| 1985 | flupirtine maleate    | Katadolon       | S |
| 1985 | malotilate            | Kantec          | S |
| 1985 | nimesulide            | Aulin           | S |
| 1985 | nimodipine            | Nimotop         | S |
| 1985 | nitrendipine          | Bayotensin      | S |
| 1985 | ofloxacin             | Tarivid         | S |
| 1985 | pefloxacin mesylate   | Peflacin        | S |
| 1985 | quazepam              | Selepam         | S |
| 1985 | sulconazole nitrate   | Exelderm        | S |
| 1986 | adrafinil             | Olmifon         | S |
| 1986 | amfenac sodium        | Fenazox         | S |
| 1986 | azelastine HCl        | Azeptin         | S |
| 1986 | azosemide             | Luret           | S |
| 1986 | beclobrate            | Beclosclerin    | S |
| 1986 | binifibrate           | Biniwas         | S |
| 1986 | butoconazole          | Femstat         | S |
| 1986 | carboplatin           | Paraplatin      | S |
| 1986 | ciprofloxacin         | Ciprobay        | S |
| 1986 | cloconazole HCl       | Pilzcin         | S |
| 1986 | clodronate disodium   | Bonefos         | S |
| 1986 | enoxacin              | Flumark         | S |
| 1986 | felbinac              | Napageln        | S |
| 1986 | flutoprazepam         | Restas          | S |
| 1986 | lobenzarit sodium     | Carfenil        | S |
| 1986 | loxoprofen sodium     | Loxonin         | S |

|      |                          |                  |   |
|------|--------------------------|------------------|---|
| 1986 | medifoxamine fumarate    | Cledail          | S |
| 1986 | osalazine sodium         | Dipentum         | S |
| 1986 | piproxen                 | Piproxen         | S |
| 1986 | propacetamol HCl         | Pro-dafalgan     | S |
| 1986 | propofol                 | Diprivan         | S |
| 1986 | ronifibrate              | Cloprane         | S |
| 1986 | roxatidine acetate HCl   | Altat            | S |
| 1986 | trientine HCl            | Cuprid           | S |
| 1986 | troxipide                | Aplace           | S |
| 1986 | zopiclone                | Imovane          | S |
| 1987 | amsacrine                | Amsakrin         | S |
| 1987 | benexate HCl             | Lonmiel          | S |
| 1987 | bifemelane HCl           | Alnert           | S |
| 1987 | cetirizine HCl           | Zyrtec           | S |
| 1987 | disodium pamidronate     | Aminomux         | S |
| 1987 | encainide HCl            | Enkaid           | S |
| 1987 | fenticonazole nitrate    | Lomexin          | S |
| 1987 | flunoxaprofen            | Priaxim          | S |
| 1987 | flurbiprofen sodium      | Ocufen           | S |
| 1987 | ibuprofen guaiacol ester | Benflogin        | S |
| 1987 | lonidamine               | Doridamina       | S |
| 1987 | lumefantrine             | lumefantrine     | S |
| 1987 | metaclozepam             | Talis            | S |
| 1987 | nilutamide               | Anandron         | S |
| 1987 | nizatidine               | Axid             | S |
| 1987 | oxiracetam               | Neuromet         | S |
| 1987 | pinacidil                | Pindac           | S |
| 1987 | ranimustine              | Cymerine         | S |
| 1987 | repirinast               | Romet            | S |
| 1987 | rimantadine HCl          | Roflual          | S |
| 1987 | setastine HCl            | Loderix          | S |
| 1987 | spizofurone              | Maon             | S |
| 1987 | tenoxicam                | Tilcotil         | S |
| 1987 | zuclopenthixol acetate   | Clopixol_Acutard | S |
| 1988 | acrivastine              | Semprex          | S |
| 1988 | alfuzosin HCl            | Xatral           | S |
| 1988 | cadralazine              | Cadraten         | S |
| 1988 | cicletanine              | Tenstaten        | S |
| 1988 | cisapride                | Prepulsid        | S |
| 1988 | clobenoside              | Arvigol          | S |
| 1988 | exifone                  | Adlone           | S |
| 1988 | felodipine               | Plendil          | S |
| 1988 | fluconazole              | Diflucan         | S |
| 1988 | guaimesal                | Bronteril        | S |
| 1988 | halofantrine             | Halfan           | S |

|      |                          |                  |   |
|------|--------------------------|------------------|---|
| 1988 | indeloxazine HCl         | Elen             | S |
| 1988 | itraconazole             | Sporanox         | S |
| 1988 | levodropropizine         | Levotuss         | S |
| 1988 | loratadine               | Claritin         | S |
| 1988 | nizofenone fumarate      | Ekonal           | S |
| 1988 | omeprazole               | Losec            | S |
| 1988 | piroxicam cinnamate      | Sinartrol        | S |
| 1988 | rilmenidine              | Hyperium         | S |
| 1988 | taurolidine              | Taurolin         | S |
| 1988 | tiamenidine HCl          | Sundralen        | S |
| 1988 | tinazoline               | Varsyl           | S |
| 1988 | zinc acexamate           | Copinal          | S |
| 1988 | zolpidem hemitartrate    | Stilnox          | S |
| 1989 | bupropion HCl            | Wellbutrin       | S |
| 1989 | fepradiinol              | Flexidol         | S |
| 1989 | foscarnet sodium         | Foscavir         | S |
| 1989 | fotemustine              | Muphoran         | S |
| 1989 | indecainide              | Decabid          | S |
| 1989 | irsogladine              | Gaslon-N         | S |
| 1989 | isradipine               | Prescal          | S |
| 1989 | lomefloxacin             | Uniquin          | S |
| 1989 | nilvadipine              | Nivadil          | S |
| 1989 | rilmazafone              | Rhythmy          | S |
| 1989 | zonisamide               | Excegran         | S |
| 1990 | aminoprofen              | Aldospray        | S |
| 1990 | amlodipine besylate      | Istin            | S |
| 1990 | bisantrene hydrochloride | Zantrene         | S |
| 1990 | colfosceril palmitate    | Exosurf_Neonatal | S |
| 1990 | droxicam                 | Ombolan          | S |
| 1990 | ebastine                 | Ebastel          | S |
| 1990 | ketorolac tromethamine   | Toradol_IM       | S |
| 1990 | lamotrigine              | Lamictal         | S |
| 1990 | manidipine hydrochloride | Calslot          | S |
| 1990 | morizine hydrochloride   | Ethmazine        | S |
| 1990 | nisoldipine              | Baymycard        | S |
| 1990 | oxcarbazepine            | Trileptal        | S |
| 1990 | sevoflurane              | Sevofrane        | S |
| 1990 | tazanolast               | Tazalest         | S |
| 1990 | tiracizine hydrochloride | Bonnecor         | S |
| 1990 | tosufloxacin             | Ozex             | S |
| 1990 | tropesin                 | Repanidal        | S |
| 1990 | vesnarinone              | Arkin-Z          | S |
| 1991 | amorolfine hydrochloride | Loceryl          | S |
| 1991 | benidipine hydrochloride | Coniel           | S |
| 1991 | gallium nitrate          | Ganite           | S |

|      |                                             |            |   |
|------|---------------------------------------------|------------|---|
| 1991 | lacidipine                                  | Lacipil    | S |
| 1991 | levocabastine hydrochloride                 | Livostin   | S |
| 1991 | pemirolast potassium                        | Pemilaston | S |
| 1991 | pilsicainide hydrochloride                  | Sunrythm   | S |
| 1991 | temafloxacin hydrochloride                  | Temac      | S |
| 1992 | aceclofenac                                 | Airtal     | S |
| 1992 | barnidipine hydrochloride                   | Hypoca     | S |
| 1992 | butibufen                                   | Butilopan  | S |
| 1992 | desflurane                                  | Suprane    | S |
| 1992 | dexrazoxane                                 | Cardioxane | S |
| 1992 | floxacin                                    | Quinodis   | S |
| 1992 | flosequinan                                 | Manoplax   | S |
| 1992 | lansoprazole                                | Ogast      | S |
| 1992 | iodoxamide tromethamine                     | Aolmide    | S |
| 1992 | lofexidine                                  | Britlofex  | S |
| 1992 | propiverine hydrochloride                   | Mictonorm  | S |
| 1992 | rufloxacin hydrochloride                    | Qari       | S |
| 1992 | sertaconazole nitrate                       | Dermofix   | S |
| 1992 | telmesteine                                 | Reolase    | S |
| 1993 | aniracetam                                  | Draganon   | S |
| 1993 | cinolazepam                                 | Gerodorm   | S |
| 1993 | emedastine difumarate                       | Daren      | S |
| 1993 | felbamate                                   | Felbatol   | S |
| 1993 | levofloxacin                                | Floxacin   | S |
| 1993 | nadifloxacin                                | Acuatim    | S |
| 1993 | neltenexine                                 | Tenoxol    | S |
| 1993 | neticonazole HCl                            | Atolant    | S |
| 1993 | pidotimod                                   | Polimod    | S |
| 1993 | pramiracetam H <sub>2</sub> SO <sub>4</sub> | Remen      | S |
| 1993 | sparfloxacin                                | Spara      | S |
| 1993 | torasemide                                  | Unat       | S |
| 1993 | zaltoprofen                                 | Soleton    | S |
| 1994 | actarit                                     | Orcl       | S |
| 1994 | amproxicam                                  | Nacyl      | S |
| 1994 | dexibuprofen                                | Seractyl   | S |
| 1994 | efonidipine hydrochloride                   | Landel     | S |
| 1994 | epinastine hydrochloride                    | Alesion    | S |
| 1994 | lanoconazole                                | Astat      | S |
| 1994 | modafinil                                   | Modiodal   | S |
| 1994 | mofezolac                                   | Disopain   | S |
| 1994 | pantoprazole sodium                         | Pantozol   | S |
| 1994 | pimobendan                                  | Acardl     | S |
| 1994 | pirmenol hydrochloride                      | Pimenol    | S |
| 1994 | sobuzoxane                                  | Perazolin  | S |
| 1995 | amifostine                                  | Ethyol     | S |

|      |                            |              |   |
|------|----------------------------|--------------|---|
| 1995 | cinildipine                | Cinalong     | S |
| 1995 | defeiprone                 | Kelfer       | S |
| 1995 | erdosteine                 | Edirel       | S |
| 1995 | fasudil HCl                | Eril         | S |
| 1995 | flutrimazole               | Micetal      | S |
| 1995 | glimepiride                | Amaryl       | S |
| 1995 | nedaplatin                 | Aqupla       | S |
| 1995 | ranitidine bismuth citrate | Pylorid      | S |
| 1995 | suplatast tosylate         | IPD          | S |
| 1995 | tenidap sodium             | Enablex      | S |
| 1995 | tiludronate disodium       | Skelid       | S |
| 1996 | aranidipine                | Bec/Sapresta | S |
| 1996 | dexketoprofen trometamol   | Enantyum     | S |
| 1996 | fexofenadine               | Allegra      | S |
| 1996 | fosphenytoin sodium        | Cerebyx      | S |
| 1996 | ibandronic acid            | Bondronat    | S |
| 1996 | ibutilide fumarate         | Corvert      | S |
| 1996 | nevirapine                 | Viramune     | S |
| 1996 | oxaliplatin                | Eloxatin     | S |
| 1996 | remifentanil HCl           | Ultiva       | S |
| 1996 | riluzole                   | Rilutek      | S |
| 1996 | ropivacaine                | Naropin      | S |
| 1996 | sodium phenylbutyrate      | Buphenyl     | S |
| 1997 | balsalazide disodium       | Colazide     | S |
| 1997 | bromfenac sodium           | Duract       | S |
| 1997 | delavirdine mesylate       | Rescriptor   | S |
| 1997 | ebrotidine                 | Ebrocrit     | S |
| 1997 | grepafloxacin              | Vaxar        | S |
| 1997 | imiquimod                  | Aldara       | S |
| 1997 | incadronic acid            | Bisphonal    | S |
| 1997 | lercanidipine              | Lerdip       | S |
| 1997 | lornoxicam                 | Xefo         | S |
| 1997 | mibefradil hydrochloride   | Posicor      | S |
| 1997 | olopatadine HCl            | Patanol      | S |
| 1997 | pivagabine                 | Tonerg       | S |
| 1998 | amtolmetin guacil          | Eufans       | S |
| 1998 | efavirenz                  | Sustiva      | S |
| 1998 | lobaplatin                 | Lobaplatin   | S |
| 1998 | mizolastine                | Mizollen     | S |
| 1998 | rabeprazole sodium         | Pariet       | S |
| 1998 | repaglinide                | Prandin      | S |
| 1998 | risedronate sodium         | Actonel      | S |
| 1998 | trovafloxacin mesylate     | Trovan       | S |
| 1999 | gatilfloxacin              | Tequin       | S |
| 1999 | heptaplatin /SK-2053R      | Sunpla       | S |



|      |                             |                      |   |
|------|-----------------------------|----------------------|---|
| 1999 | lomerizine HCl              | Terranas             | S |
| 1999 | mivotilate                  | mivotilate           | S |
| 1999 | moxifloxacin HCl            | Avelox               | S |
| 1999 | nifekalant HCl              | Shinbit              | S |
| 1999 | pioglitazone NCl            | Actos                | S |
| 1999 | zaleplon                    | Sonata               | S |
| 2000 | arsenic trioxide            | Trisenox             | S |
| 2000 | betotastine besilate        | Talion               | S |
| 2000 | dofetilide                  | Tikosyn              | S |
| 2000 | esomeprazole magnesium      | Nexium               | S |
| 2000 | lafutidine                  | Stogar               | S |
| 2000 | levetiracetam               | Keppra               | S |
| 2000 | levobupivacaine             | Chirocaine           | S |
| 2000 | linezolid                   | Zyvox                | S |
| 2000 | ramatroban                  | Baynas               | S |
| 2000 | zoledronic acid             | Zometa               | S |
| 2001 | desloratadine               | Clarinet/Neoclarityn | S |
| 2001 | edarvarone                  | Radicut              | S |
| 2001 | levocetirizine              | Xyzal/Xusal          | S |
| 2001 | rupatadine fumarate         | Rupafin              | S |
| 2002 | balofloxacin                | Q-Roxin              | S |
| 2002 | dexmethylphenidate          | Focalin              | S |
| 2002 | ezetimibe                   | Zetia                | S |
| 2002 | neridronic acid             | Nerixia              | S |
| 2002 | nitisinone                  | Orfadin              | S |
| 2002 | pazufloxacin                | Pasil                | S |
| 2002 | prulifloxacin               | Sword                | S |
| 2002 | voriconazole                | Vfend                | S |
| 2003 | azelnipidine                | Calblock             | S |
| 2003 | fosfluconazole              | Prodif               | S |
| 2003 | gemifloxacin mesilate       | Factive              | S |
| 2004 | cinacalcet                  | Sensipar             | S |
| 2004 | mitiglinide calcium hydrate | Glufast              | S |
| 2004 | solifenacin succinate       | Vesicare             | S |
| 2004 | strontium ranelate          | Protelos             | S |
| 2005 | deferasirox                 | Exjade               | S |
| 2005 | eberconazole                | Ebernet              | S |
| 2005 | eszopiclone                 | Lunesta              | S |
| 2005 | ivabrandin hydrochloride    | Procoralan           | S |
| 2005 | lanthanum carbonate         | Fosrenol             | S |
| 2005 | lenalidomide                | Revlimid             | S |
| 2005 | luliconazole                | Lulicon              | S |
| 2005 | nepafenac                   | Nevanac              | S |
| 2005 | posaconazole                | Noxafil              | S |
| 2005 | rasagline mesilate          | Azilect              | S |

|      |                               |           |      |
|------|-------------------------------|-----------|------|
| 2005 | sorafenib                     | Nexavar   | S    |
| 2006 | ranolazine                    | Ranexa    | S    |
| 2006 | silodosin                     | Urief     | S    |
| 2007 | garenoxacin                   | Geninax   | S    |
| 2007 | imidafenacin                  | Uritos    | S    |
| 2007 | maraviroc                     | Celsentri | S    |
| 2007 | raltegravir potassium         | Isentress | S    |
| 2007 | revaprazan hydrochloride      | Revanex   | S    |
| 2007 | rufinamide                    | Xilep     | S    |
| 2007 | stiripentol                   | Diacomit  | S    |
| 2008 | choline fenofibrate           | Trilipix  | S    |
| 2008 | clevipidine butyrate          | Cleviprex | S    |
| 2008 | eltrombopag olamine           | Promacta  | S    |
| 2008 | pirfenidone                   | Pirespa   | S    |
| 2008 | sitafloxacin hydrate          | Gracevit  | S    |
| 2009 | armodafinil                   | Nuvigil   | S    |
| 2009 | besifloxacin                  | Besivance | S    |
| 2009 | dexlansoprazole               | Dexilant  | S    |
| 2009 | dronedarone HCl               | Multaq    | S    |
| 2009 | eslicarbazepine acetate       | Zebinix   | S    |
| 2009 | minodronate                   | Bonoteo   | S    |
| 2009 | plerixafor hydrochloride      | Mozobil   | S    |
| 2010 | 3,4-diaminopyridine phosphate | Firdapse  | S    |
| 2010 | 4-aminopyridine               | Ampyra    | S    |
| 2010 | bilastine                     | Bilatex   | S    |
| 2010 | miriplatin hydrate            | Miripla   | S    |
| 2010 | vernakalant HCl               | Brinavess | S    |
| 1981 | selegiline HCl                | Jumex     | S/NM |
| 1983 | amrinone                      | Inocor    | S/NM |
| 1983 | fluvoxamine maleate           | Floxyfral | S/NM |
| 1984 | tizanidine                    | Sirdalud  | S/NM |
| 1984 | toloxatone                    | Humoryl   | S/NM |
| 1985 | bunazosin HCl                 | Detandol  | S/NM |
| 1985 | camostat mesylate             | Foipan    | S/NM |
| 1985 | ketanserin                    | Serefrex  | S/NM |
| 1985 | trimazosin HCl                | Supres    | S/NM |
| 1986 | amisulpride                   | Socian    | S/NM |
| 1986 | fluoxetine HCl                | Prozac    | S/NM |
| 1986 | nafamostat mesylate           | Futhan    | S/NM |
| 1987 | dapiprazole HCl               | Glamidolo | S/NM |
| 1987 | flumazenil                    | Anexate   | S/NM |
| 1987 | levosulpiride                 | Levopraid | S/NM |
| 1987 | picotamide                    | Plactidil | S/NM |
| 1988 | apraclonidine HCl             | Iopidine  | S/NM |
| 1988 | cilostazol                    | Pletal    | S/NM |

|      |                             |           |      |
|------|-----------------------------|-----------|------|
| 1988 | doxazosin mesylate          | Carduran  | S/NM |
| 1988 | enoximone                   | Perfan    | S/NM |
| 1988 | ozagrel sodium              | Xanbon    | S/NM |
| 1989 | ibudilast                   | Ketas     | S/NM |
| 1989 | milrinone                   | Corotrope | S/NM |
| 1989 | setiptiline                 | Tecipul   | S/NM |
| 1989 | tolrestat                   | Alredase  | S/NM |
| 1989 | toremifene                  | Fareston  | S/NM |
| 1990 | cinitapride                 | Cidine    | S/NM |
| 1990 | moclobemide                 | Aurorix   | S/NM |
| 1990 | setraline hydrochloride     | Lustral   | S/NM |
| 1991 | alpidem                     | Ananxyl   | S/NM |
| 1991 | clospipramine hydrochloride | Cremin    | S/NM |
| 1991 | dezocine                    | Dalgan    | S/NM |
| 1991 | nemonapride                 | Emilace   | S/NM |
| 1991 | paroxetine                  | Seroxat   | S/NM |
| 1991 | terbinafine hydrochloride   | Lamisil   | S/NM |
| 1992 | butenafine hydrochloride    | Mentax    | S/NM |
| 1992 | epalrestat                  | Kinedak   | S/NM |
| 1993 | risperidone                 | Risperdal | S/NM |
| 1993 | sarpogrelate HCl            | Anplag    | S/NM |
| 1993 | tacrine HCl                 | Cognex    | S/NM |
| 1993 | tamsulosin HCl              | Harnal    | S/NM |
| 1994 | broxaterol                  | Summair   | S/NM |
| 1994 | losartan potassium          | Cozaar    | S/NM |
| 1994 | mirtazapine                 | Remeron   | S/NM |
| 1994 | nefazodone hydrochloride    | Serzone   | S/NM |
| 1994 | venlafaxine                 | Effexor   | S/NM |
| 1995 | anastrozole                 | Arimidex  | S/NM |
| 1995 | bicalutamide                | Casodex   | S/NM |
| 1995 | dorzolamide HCl             | Trusopt   | S/NM |
| 1995 | fadrozole HCl               | Afema     | S/NM |
| 1995 | seratrodast                 | Bronica   | S/NM |
| 1996 | brimonidine                 | Alphagan  | S/NM |
| 1996 | letrozole                   | Femara    | S/NM |
| 1996 | meloxicam                   | Mobec     | S/NM |
| 1996 | olanzapine                  | Zyprexa   | S/NM |
| 1996 | talipexole                  | Domin     | S/NM |
| 1996 | tandospirone                | Sediel    | S/NM |
| 1996 | valsartan                   | Diovan    | S/NM |
| 1996 | zafirlukast                 | Accolate  | S/NM |
| 1997 | budipine                    | Parkinsan | S/NM |
| 1997 | candesartan cilexetil       | Atacand   | S/NM |
| 1997 | dexfenfluramine             | Redux     | S/NM |
| 1997 | donepezil HCl               | Aricept   | S/NM |

|      |                             |            |      |
|------|-----------------------------|------------|------|
| 1997 | eprosartan                  | Teveten    | S/NM |
| 1997 | irbesartan                  | Avapro     | S/NM |
| 1997 | milnacipran                 | Ixel       | S/NM |
| 1997 | nebivolol                   | Nebilet    | S/NM |
| 1997 | pramipexole HCl             | Mirapex    | S/NM |
| 1997 | quetiapine fumarate         | Seroquel   | S/NM |
| 1997 | reboxetine                  | Edronax    | S/NM |
| 1997 | rivastigmin                 | Exelon     | S/NM |
| 1997 | tolterodine                 | Detrusitol | S/NM |
| 1997 | troglitazone                | Rezulin    | S/NM |
| 1997 | zileuton                    | Zyflo      | S/NM |
| 1998 | brinzolamide                | Azopt      | S/NM |
| 1998 | clopidogrel hydrogensulfate | Plavix     | S/NM |
| 1998 | fenoldopam mesylate         | Corlopan   | S/NM |
| 1998 | fomepizole                  | Antizol    | S/NM |
| 1998 | lefunomide                  | Arava      | S/NM |
| 1998 | montelukast sodium          | Singulair  | S/NM |
| 1998 | mosapride citrate           | Gasmotin   | S/NM |
| 1998 | raloxifene HCl              | Evista     | S/NM |
| 1998 | sibutramine                 | Meridia    | S/NM |
| 1998 | tirofiban HCl               | Aggrastat  | S/NM |
| 1999 | celecoxib                   | Celebrex   | S/NM |
| 1999 | naftopidil                  | Flivas     | S/NM |
| 1999 | rofecoxib                   | Vioxx      | S/NM |
| 1999 | rosiglitazone maleate       | Avandia    | S/NM |
| 1999 | telmisartan                 | Micardis   | S/NM |
| 2000 | dexmedetomidine HCl         | Precedex   | S/NM |
| 2000 | levosimendan                | Simdax     | S/NM |
| 2000 | liranaftate                 | Zefnart    | S/NM |
| 2001 | bosentan                    | Tra-cleer  | S/NM |
| 2001 | imatinib mesilate           | Gleevec    | S/NM |
| 2002 | aripiprazole                | Abilify    | S/NM |
| 2002 | etoricoxib                  | Arcoxia    | S/NM |
| 2002 | gefitinib                   | Iressa     | S/NM |
| 2002 | olmesartan medoxil          | Benicar    | S/NM |
| 2002 | parecoxib sodium            | Dynastat   | S/NM |
| 2002 | sivelestat sodium hydrate   | Elaspol    | S/NM |
| 2002 | temoporfin                  | Foscan     | S/NM |
| 2002 | valdecoxib                  | Bextra     | S/NM |
| 2003 | aprepitant                  | Emend      | S/NM |
| 2003 | bortezomib                  | Velcade    | S/NM |
| 2004 | duloxetine hydrochloride    | Cymbalta   | S/NM |
| 2004 | erlotinib hydrochloride     | Tarceva    | S/NM |
| 2005 | darifenacin hydrobromide    | Emselex    | S/NM |
| 2005 | lumiracoxib                 | Prexige    | S/NM |

|      |                           |            |      |
|------|---------------------------|------------|------|
| 2005 | ramelteon                 | Rozerem    | S/NM |
| 2006 | conivaptan HCl            | Vaprisol   | S/NM |
| 2006 | darunavir                 | Prezista   | S/NM |
| 2006 | dasatinib                 | Sprycel    | S/NM |
| 2006 | mozavaptan                | Physuline  | S/NM |
| 2006 | rimonabant                | Acomplia   | S/NM |
| 2006 | rotigotine                | Neupro     | S/NM |
| 2006 | sitagliptin               | Januvia    | S/NM |
| 2006 | sitaxsentan sodium        | Thelin     | S/NM |
| 2006 | sunitinib malate          | Sutent     | S/NM |
| 2006 | varenicline tartrate      | Chantix    | S/NM |
| 2007 | ambrisentan               | Letairis   | S/NM |
| 2007 | lapatinib ditosylate      | Tykerb     | S/NM |
| 2007 | nilotinib hydrochloride   | Tasigna    | S/NM |
| 2007 | paliperidone              | Invega     | S/NM |
| 2007 | vildagliptin              | Galvus     | S/NM |
| 2008 | blonanserin               | Lonasen    | S/NM |
| 2008 | desvenlafaxine succinate  | Pristiq    | S/NM |
| 2008 | fesoterodine fumarate     | Toviaz     | S/NM |
| 2008 | fosaprepitant dimeglumine | Ivemend    | S/NM |
| 2009 | asenapine maleate         | Saphris    | S/NM |
| 2009 | dapoxetine HCl            | Priligy    | S/NM |
| 2009 | febuxostat                | Adenuric   | S/NM |
| 2009 | lasofoxifene tartrate     | Fablyn     | S/NM |
| 2009 | niacin/laropiprant        | Tredaptive | S/NM |
| 2009 | pazopanib                 | Votrient   | S/NM |
| 2009 | prasugrel                 | Efient     | S/NM |
| 2009 | saxagliptin               | Onglyza    | S/NM |
| 2009 | tapentadol HCL            | Nucynta    | S/NM |
| 2009 | tolvaptan                 | Samsca     | S/NM |
| 2010 | alogliptin benzoate       | Nesina     | S/NM |
| 2010 | bazedoxifene acetate      | Conbriza   | S/NM |
| 2010 | iloperidone               | Fanapt     | S/NM |
| 2010 | peramivir                 | PeramiFlu  | S/NM |
| 2010 | prucalopride              | Resolor    | S/NM |
| 2010 | roflumilast               | Daxas      | S/NM |

---

### III. CALCULATION OF STRUCTURAL AND PHYSICOCHEMICAL PARAMETERS

#### A. CALCULATION OF PARAMETERS USING INSTANTJCHEM

Physicochemical parameters for approved small-molecule drugs were calculated using the InstantJChem platform for cheminformatic analysis developed by ChemAxon.<sup>1</sup> Our procedure for the calculation of physicochemical descriptors using InstantJChem has been reported in detail previously.<sup>2</sup> The protocol for this analysis is as follows:

- 1) SMILES codes for drugs were saved as a tab delimited text (.txt) file in MS Excel with two columns: Column A contained compound names and Column B contained the SMILES codes. A header row was not included.
- 2) SMILES codes were imported into InstantJChem.
  - a) Clicked **"File"** > **"New Project"** > **"Next."**
  - b) Specified name and location for the project folder, then clicked **"Finish."**
  - c) Clicked **"File"** > **"Import File"** > **"Next."**
  - d) Clicked on the folder icon next to the **"File to Import"** field and located the file containing the SMILES codes. Under **"File Format"** chose **"Delineated text files (\*.csv, \*.tab, \*.txt)."** InstantJChem scanned the file and indicated the number of fields found. Once the file was scanned, clicked **"Next."**
  - e) The **"Field Details"** panel gave a summary of the fields to be imported from the text file. The structure, molecular weight, molecular formula, and compound name of each entry were displayed by default. Undesired term fields were removed using the **"< Remove"** button. When finished, clicked **"Next."**
  - f) The **"Monitor Import"** window gave a summary of the imported data. Once fully processed, clicked **"Finish."**
- 3) New chemical terms were added by clicking **"Data"** > **"New Chemical Terms Field."** Some chemical terms were manually defined in the expression window. User-defined chemical terms can be saved to the "Expression" menu by clicking on the yellow star to the right of the menu.

Molecular weight (MW): mass()

N atom count (N): atomCount("7")

O atom count (O): atomCount("8")

H-bond donor count (HBD): donorCount()

H-bond acceptor (HBA): acceptorCount()

Rotatable bond count (Rot): rotatableBondCount()

Stereocenter count (nStereo): chiralCenterCount()

Topological polar surface area (tPSA): PSA()

Number of rings (Rings): ringCount()

Aromatic ring count (RngAr): aromaticRingCount()

Ring system count (RngSys): ringSystemCount()

Size of largest ring (RngLg): largestRingSize()

Fraction of sp<sup>3</sup>-hybridized carbons (Fsp<sup>3</sup>): count(filter('atno()==6 && connections()==4'))/atomCount("6")

*n*-Octanol/water partition coefficient at pH=7.4 (LogD): logd('7.4')

van der Waals surface area (VWSA): vanDerWaalsSurfaceArea()

Relative polar surface area (relPSA): PSA()/vanDerWaals SurfaceArea()

- 4) Once all desired chemical terms were added to the grid, used **"File"** > **"Export to File"** to export the data as an Excel file (.xls).
- 5) Once the export process completed, clicked **"Finish."**

## B. BATCH CALCULATION OF ALOGPs / ALOGpS

Calculation of the ALOGPs and ALOGpS parameters was carried out using the Virtual Computational Chemistry (VCC) Laboratory.<sup>3,4</sup> Our procedure for the calculation of ALOGPs and ALOGpS has been reported in detail previously.<sup>2</sup> The protocol for this analysis is as follows:

- 1) SMILES codes for drugs were saved as a single-column tab delimited text (.txt) file in MS Excel. Compound names and a header row were not included.
- 2) The VCC Lab website was accessed at URL: "http://www.vccclab.org/lab/alogps/start.html"
- 3) Clicked **"upload file."**
- 4) Selected **"smiles -- SMILES file – default"** from the dropdown menu and clicked **"Proceed with file uploading."**
- 5) A new browser window opened. Followed **"Step 1: Click Browse and select a file."**
- 6) Followed **"Step 2: Click Upload File."**
- 7) The window displayed "Your file "yourfile.txt" was uploaded as "smiles" successfully. Please, close this page in your browser now."
- 8) A new browser window open entitled "results.txt."
- 9) Saved the results page as a text (.txt) file.
- 10) Opened the text file containing the results using MS Excel. Here, "logP" = "ALOGPs" and "logS" = "ALOGpS." The output for SMILES codes with errors will be shown as "error in..."

## IV. PRINCIPAL COMPONENT ANALYSIS

Principal component analysis (PCA) on the physicochemical features of approved drugs was carried out using the “R” open source statistical computing software package.<sup>5</sup> Our procedure for PCA using R has been reported previously for both Mac<sup>2</sup> and Windows<sup>6</sup> operating systems. The current analysis was carried out using R and MS Excel for Mac OSX (10.8.5). The protocol is as follows:

- 1) In MS Excel, a “Raw” worksheet was created with compounds in rows and descriptors in columns. Drugs were sorted by compound source (*i.e.*, natural product drugs (NP), natural product-derived drugs (ND), natural product-inspired drugs (S\*, S\*/NM), and completely synthetic drugs (S, S/NM)), and by date of approval (ascending). Note that compound names must not have spaces or other punctuation.
- 2) Mean values and standard deviation values were calculated for each column.
- 3) A “Norm” worksheet was created and mean-centered, standardized values were generated for each column using the equation:
 
$$\text{normval} = (\text{val} - \text{Column Mean}) / \text{Column Standard Deviation}$$
- 4) With the upper left cell blank (R requires this to recognize a header row), the Number format was designated for all data columns to 4 decimal places.
- 5) The Excel workbook was saved.
- 6) The “Norm” worksheet was saved as “Data.txt” (Text–Tab Delimited) on the Desktop (Mac).
- 7) The Excel workbook was closed and the changes discarded.
- 8) The “R” open source computing package was opened and the following commands were entered:
- 9) R> read.table(“~/Desktop/Data.txt”) -> a # read data into dataframe a
- 10) R> prcomp(a) -> b # PCA of dataframe a, results to b
- 11) R> summary(b) # prints summary of %contributions
- 12) R> b # prints the rotation (loading) matrix
- 13) R> b\$x # prints the rotated data (scores)
- 14) R > b\$x -> c # defines the scores as c
- 15) R > write.table(c, “~/Desktop/scores.txt”, sep = “\t”) # saves scores as tab delimited txt file to the Desktop.
- 16) The scores were imported into a new Excel worksheet “Scores”.
- 17) The first three columns (compound names, PC1, and PC2) were copied into a new worksheet “PCA”, and the Number format was designated to 3 decimal places.
- 18) To maintain the resemblance of these PCA plots with our previous analyses,<sup>6-11</sup> scores for PC2 were inverted by multiplying each value by (–1); this is feasible because the signs and units of each principal component are arbitrary
- 19) PCA plots were generated by plotting PC1 and PC2 on XY scatter plots in MS Excel or GraphPad Prism.
- 20) The loading plot was generated by plotting the loadings for PC1 and PC2 in GraphPad Prism. Loadings on PC2 were inverted by multiplying each value by (–1) to remain consistent with the inversion of scores along PC2.



**V. SUPPLEMENTARY REFERENCES**

1. ChemAxon – InstantJChem Suite; <https://www.chemaxon.com/products/instant-jchem-suite/instant-jchem/>
2. Wenderski, T. A.; Stratton, C. F.; Bauer, R. A.; Kopp, F.; and Tan, D. S. *Methods Mol. Biol.* **2015**, *1263*, 225–242.
3. Tetko, I. V., Virtual Computational Chemistry Laboratory; <http://www.vcclab.org/lab/alogps/>
4. Tetko, I. V.; Tanchuk, V. Y.; Kasheva, T. N.; and Villa, A. E. *J. Chem. Inf. Comput. Sci.* **2001**, *41*, 246–252.
5. The R Project for Statistical Computing; <http://www.r-project.org/>
6. Davis, T. D.; Gerry, C. J.; and Tan, D. S. *ACS Chem. Biol.* **2014**, *9*, 2535–2544.
7. Bauer, R. A.; DiBlasi, C. M.; and Tan, D. S. *Org. Lett.* **2010**, *12*, 2084–2087.
8. Bauer, R. A.; Wenderski, T. A.; and Tan, D. S. *Nat. Chem. Biol.* **2013**, *9*, 21–29.
9. Bauer, R. A.; Wurst, J. M.; and Tan, D. S. *Curr. Opin. Chem. Biol.* **2010**, *14*, 308–314.
10. Kopp, F.; Stratton, C. F.; Akella, L. B.; and Tan, D. S. *Nat. Chem. Biol.* **2012**, *8*, 358–365.
11. Moura-Letts, G.; DiBlasi, H. M.; Bauer, R. A.; and Tan, D. S. *Proc. Natl. Acad. Sci. USA* **2011**, *108*, 6745–6750.
